# Supplementary material
Source: Royal Society of Chemistry journal article supplement (doi:10.1039/d6ob00372a)
Supplement: d6ob00372a1.pdf [file d6ob00372a1.pdf]

*Supporting Information for*

**H<sub>2</sub>SO<sub>4</sub>-Catalyzed One-Step Synthesis of  
β,β-Carbon-Bridged bisBODIPYs from BODIPYs  
and Aldehydes**

Hongdi Yuan,<sup>1</sup> Shuangshuang Zhu,<sup>1</sup> Kangle, Liu, Yunjie Li, Yuxiang Bai, Yihang  
Zhang, Xiaoxia Gu,<sup>\*</sup> and Fan Lv<sup>\*</sup>

<sup>a</sup>*School of Pharmacy, Wannan Medical University, Wuhu, 241002, China.*

\*E-mail: [lvfan@wnmc.edu.cn](mailto:lvfan@wnmc.edu.cn); [guxiaoxia@wnmc.edu.cn](mailto:guxiaoxia@wnmc.edu.cn)

<sup>1</sup>*Equal contribution.*

**Contents**

|                                                                                     |     |
|-------------------------------------------------------------------------------------|-----|
| 1. Figure S1 .....                                                                  | S2  |
| 2. Photophysical properties .....                                                   | S3  |
| 3. Singlet oxygen generation efficiency .....                                       | S9  |
| 4. <sup>1</sup> H, <sup>13</sup> C NMR and HRMS spectra for all new compounds ..... | S10 |
| 5. References .....                                                                 | S32 |

## 1. Figure S1

BODIPYs **B1-3** (Figure S1) were synthesized according to literature procedures.<sup>1-3</sup>

Compounds **3a-h** (Figure S1) are commercial reagents.

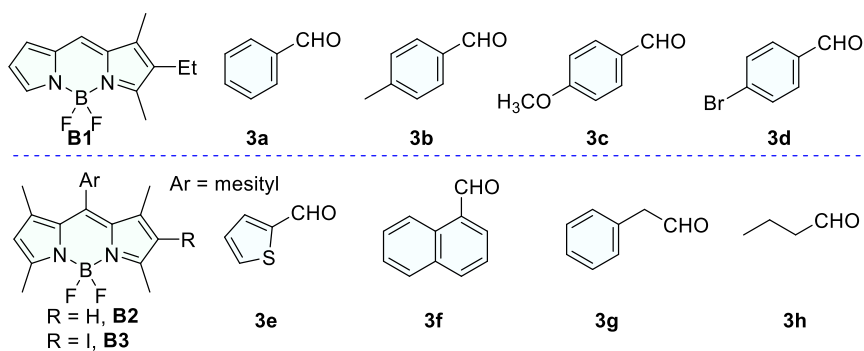

**Figure S1.** Chemical structure of BODIPYs **B1-3** and various aldehydes **3a-h**

## 2. Photophysical properties

### 2.1 Table S1: Photophysical properties of **1j** and **4** in different solvents at room temperature.

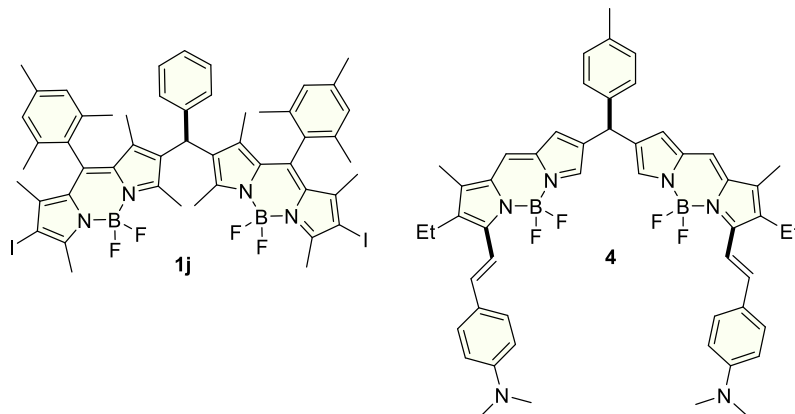

| dyes      | solvent            | $\lambda_{\text{abs}}^{\text{max}}$<br>(nm) | $\epsilon_{\text{abs}}^{\text{max}}$<br>[ $\text{M}^{-1} \text{cm}^{-1}$ ] <sup>a</sup> | $\lambda_{\text{em}}^{\text{max}}$<br>(nm) | $\Phi^{\text{b}}$ | SS ( $\text{cm}^{-1}$ ) <sup>c</sup> |
|-----------|--------------------|---------------------------------------------|-----------------------------------------------------------------------------------------|--------------------------------------------|-------------------|--------------------------------------|
| <b>1j</b> | cyclohexane        | 549                                         | 184800                                                                                  | 558                                        | 0.310             | 290                                  |
|           | Toluene            | 551                                         | 166300                                                                                  | 563                                        | 0.300             | 390                                  |
|           | THF                | 548                                         | 163500                                                                                  | 562                                        | 0.280             | 450                                  |
|           | CH <sub>3</sub> CN | 545                                         | 166200                                                                                  | 557                                        | 0.097             | 400                                  |
|           | DMSO               | 551                                         | 141500                                                                                  | 563                                        | 0.093             | 390                                  |
| <b>4</b>  | cyclohexane        | 638                                         | 90400                                                                                   | 651                                        | 0.077             | 310                                  |
|           | Toluene            | 649                                         | 155600                                                                                  | 678                                        | 0.380             | 660                                  |
|           | THF                | 645                                         | 140500                                                                                  | 691                                        | 0.015             | 820                                  |
|           | CH <sub>3</sub> CN | 644                                         | 123300                                                                                  | 717                                        | 0.007             | 1600                                 |
|           | DMSO               | 657                                         | 123400                                                                                  | 726                                        | 0.005             | 1450                                 |

<sup>a</sup>Molar absorption coefficient values rounded to the nearest  $100 \text{ M}^{-1} \text{ cm}^{-1}$ .

<sup>b</sup>Fluorescence quantum yields determined using Rhodamine B ( $\Phi = 0.49$  in ethanol) as reference.

<sup>c</sup>Stokes shift values rounded to nearest  $10 \text{ cm}^{-1}$ .

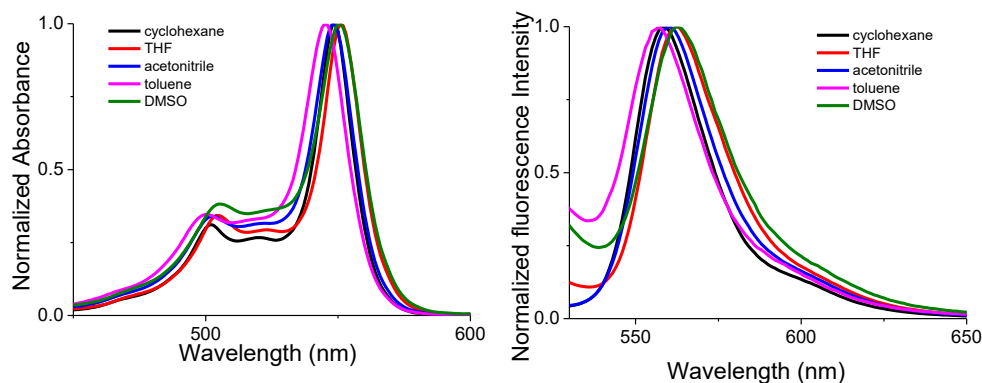

**Figure S2.** Absorption (left) and fluorescence emission (right) spectra of **1j** recorded in different solvents (excitation at 500 nm).

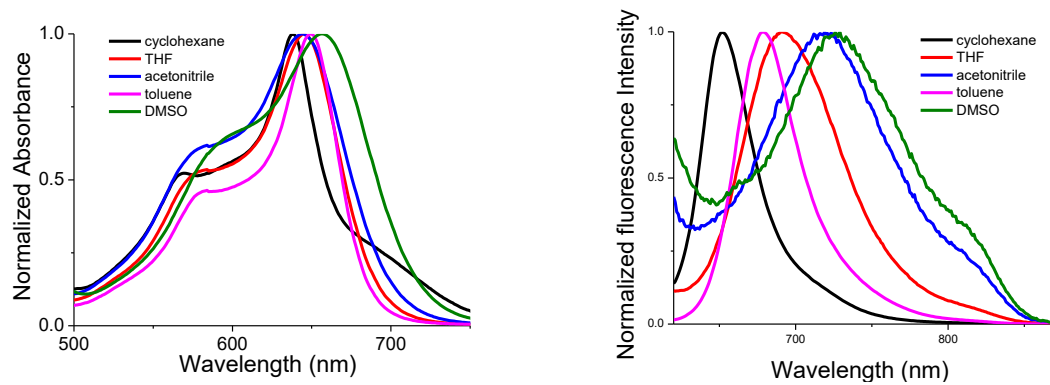

**Figure S3.** Absorption (left) and fluorescence emission (right) spectra of **4** recorded in different solvents (excitation at 600 nm).

## 2.2 UV-Vis absorption and fluorescence emission spectra in CH<sub>2</sub>Cl<sub>2</sub>.

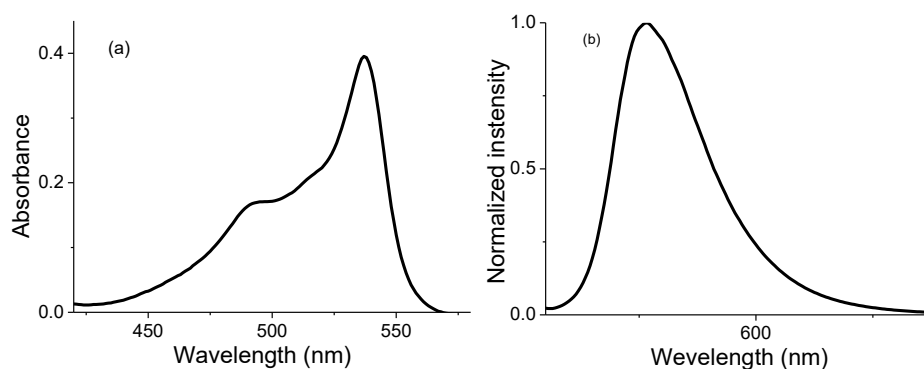

Figure S4. Absorption (a) and fluorescence emission (b) spectra of **1a** recorded in CH<sub>2</sub>Cl<sub>2</sub> (excitation at 500 nm).

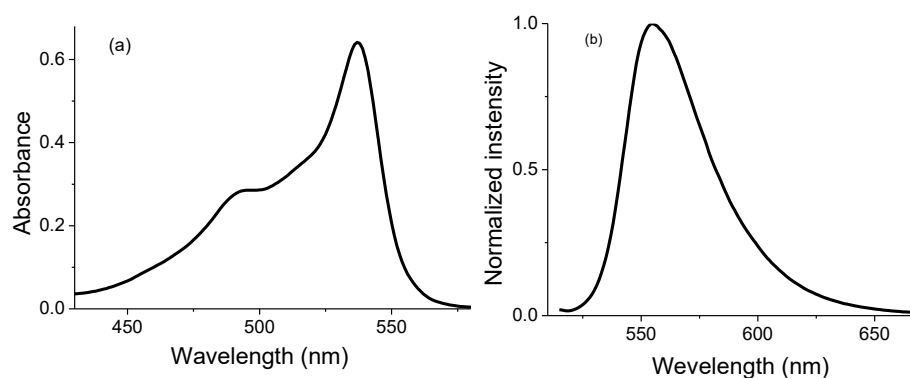

Figure S5. Absorption (a) and fluorescence emission (b) spectra of **1b** recorded in CH<sub>2</sub>Cl<sub>2</sub> (excitation at 500 nm).

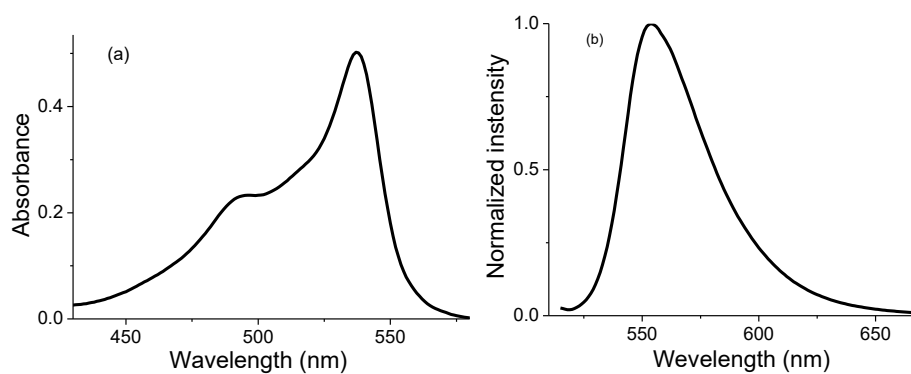

Figure S6. Absorption (a) and fluorescence emission (b) spectra of **1c** recorded in CH<sub>2</sub>Cl<sub>2</sub> (excitation at 500 nm).

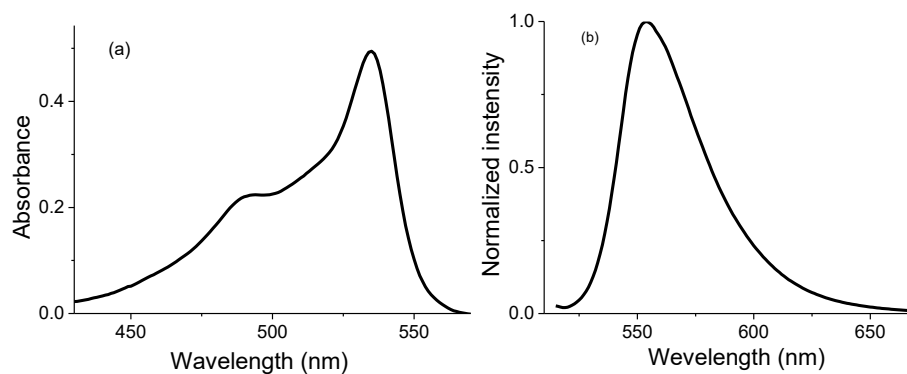

Figure S7. Absorption (a) and fluorescence emission (b) spectra of **1d** recorded in  $\text{CH}_2\text{Cl}_2$  (excitation at 500 nm).

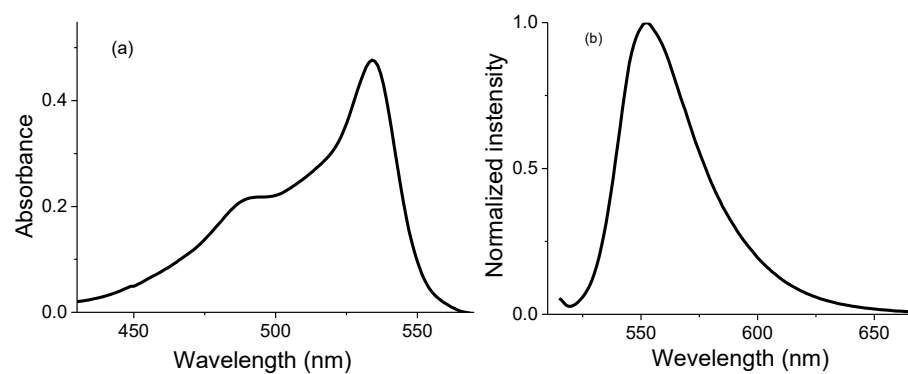

Figure S8. Absorption (a) and fluorescence emission (b) spectra of **1e** recorded in  $\text{CH}_2\text{Cl}_2$  (excitation at 500 nm).

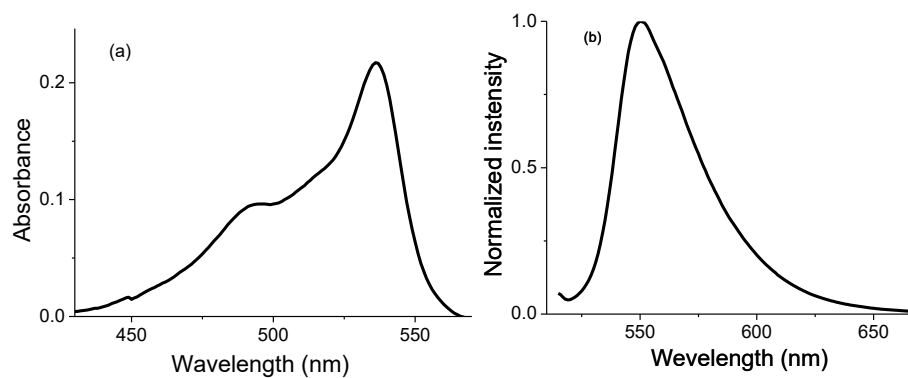

Figure S9. Absorption (a) and fluorescence emission (b) spectra of **1f** recorded in  $\text{CH}_2\text{Cl}_2$  (excitation at 500 nm).

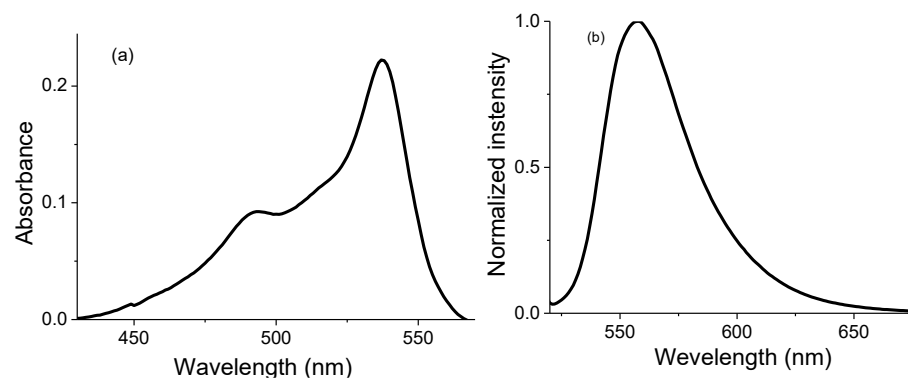

Figure S10. Absorption (a) and fluorescence emission (b) spectra of **1g** recorded in CH<sub>2</sub>Cl<sub>2</sub> (excitation at 500 nm).

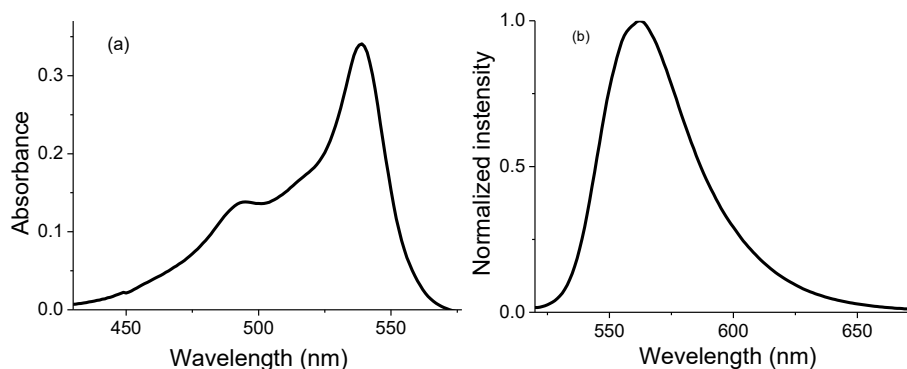

Figure S11. Absorption (a) and fluorescence emission (b) spectra of **1h** recorded in CH<sub>2</sub>Cl<sub>2</sub> (excitation at 500 nm).

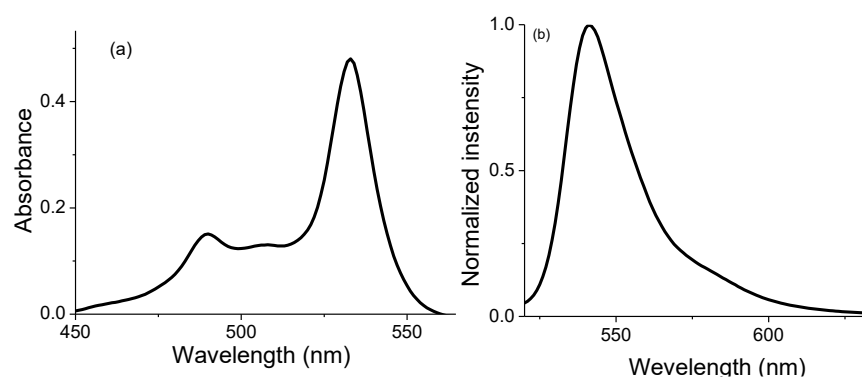

Figure S12. Absorption (a) and fluorescence emission (b) spectra of **1i** recorded in CH<sub>2</sub>Cl<sub>2</sub> (excitation at 500 nm).

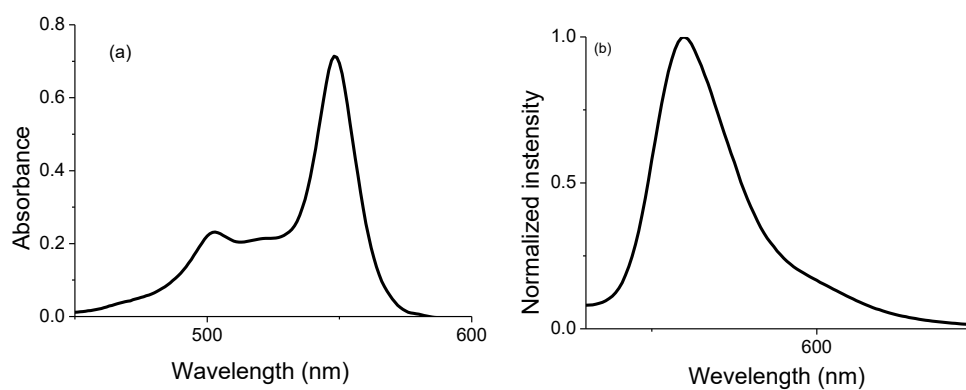

Figure S13. Absorption (a) and fluorescence emission (b) spectra of **1j** recorded in CH<sub>2</sub>Cl<sub>2</sub> (excitation at 500 nm).

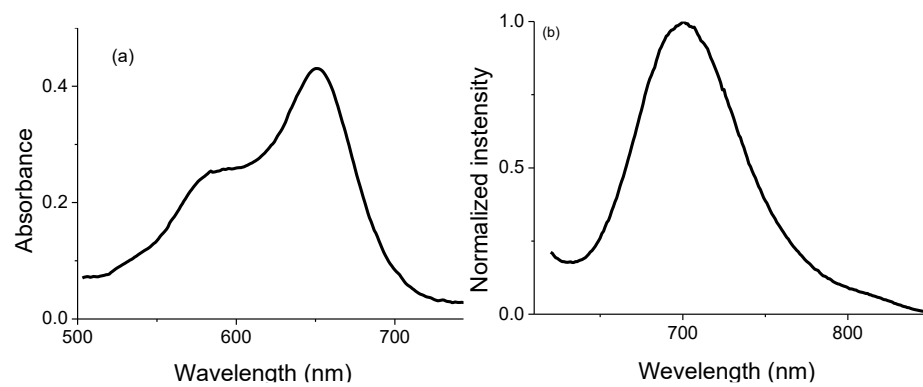

Figure S14. Absorption (a) and fluorescence emission (b) spectra of **4** recorded in  $\text{CH}_2\text{Cl}_2$  (excitation at 600 nm).

### 3. Singlet oxygen generation efficiency

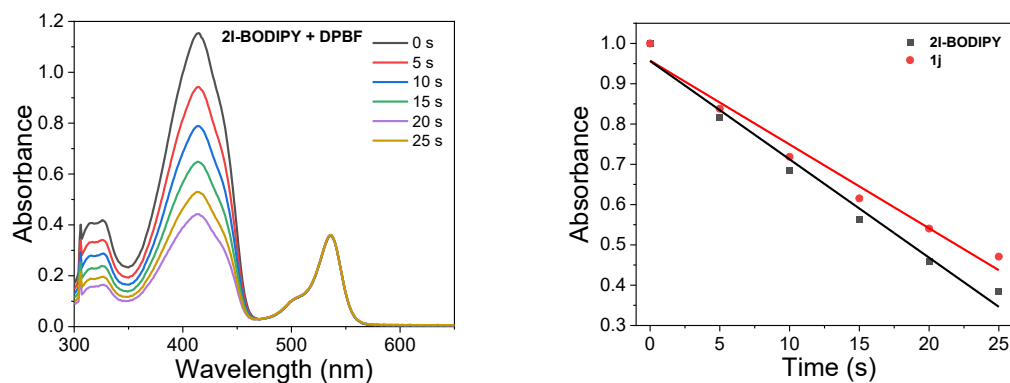

**Figure S15.** (a) Changes in the absorption spectrum of **DPBF** upon irradiation in the presence of **2I-BODIPY** in toluene (recorded at 5 s intervals). (b) Plot of change in absorbance of DPBF at 410 nm vs irradiation time in the presence of bisBODIPY **1j** in toluene against **2I-BODIPY** as the standard in toluene.

#### 4. $^1\text{H}$ , $^{13}\text{C}$ NMR and HRMS spectra of all new compounds

$^1\text{H}$  NMR spectrum of **1a** in  $\text{CDCl}_3$

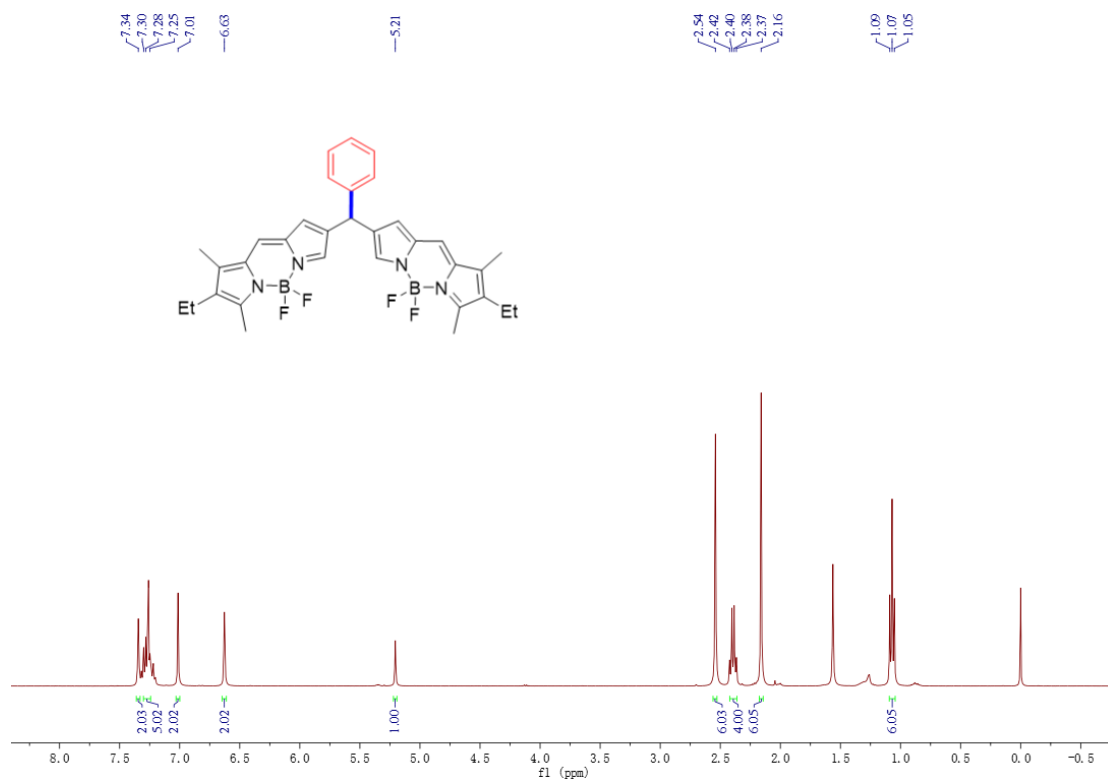

$^{13}\text{C}$  NMR spectrum of **1a** in  $\text{CDCl}_3$

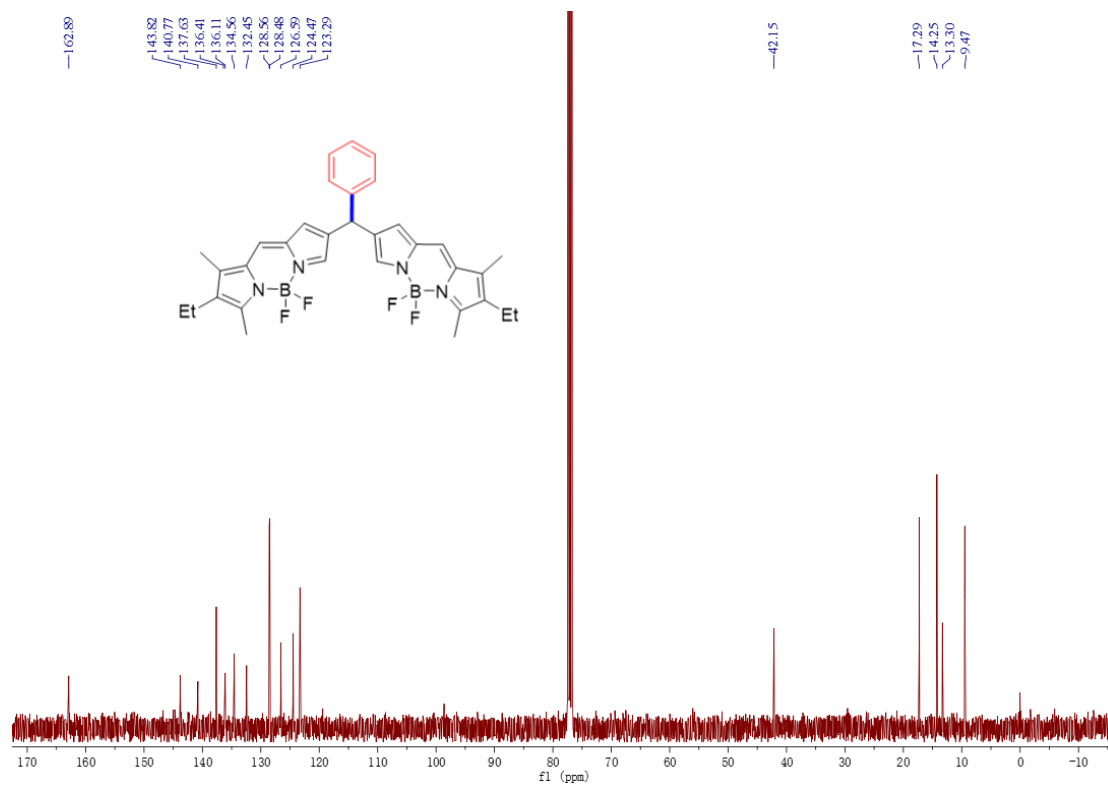

$^1\text{H}$  NMR spectrum of **1b** in  $\text{CDCl}_3$

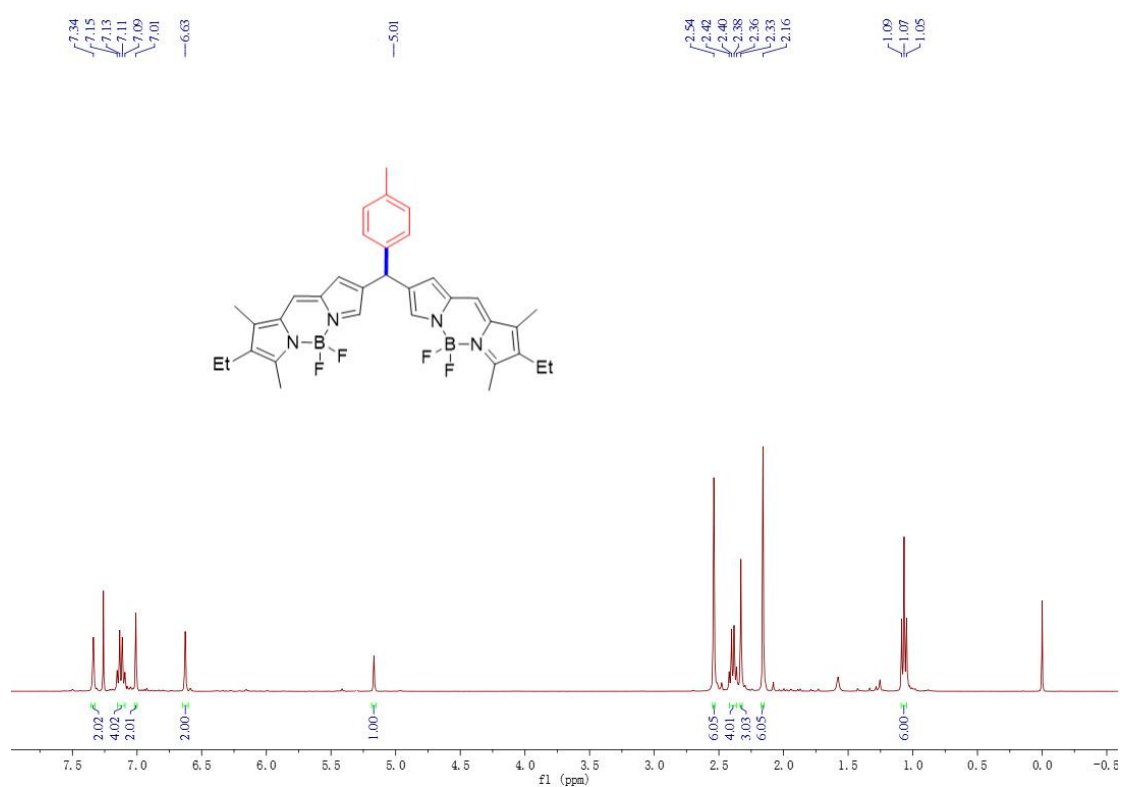

$^{13}\text{C}$  NMR spectrum of **1b** in  $\text{CDCl}_3$

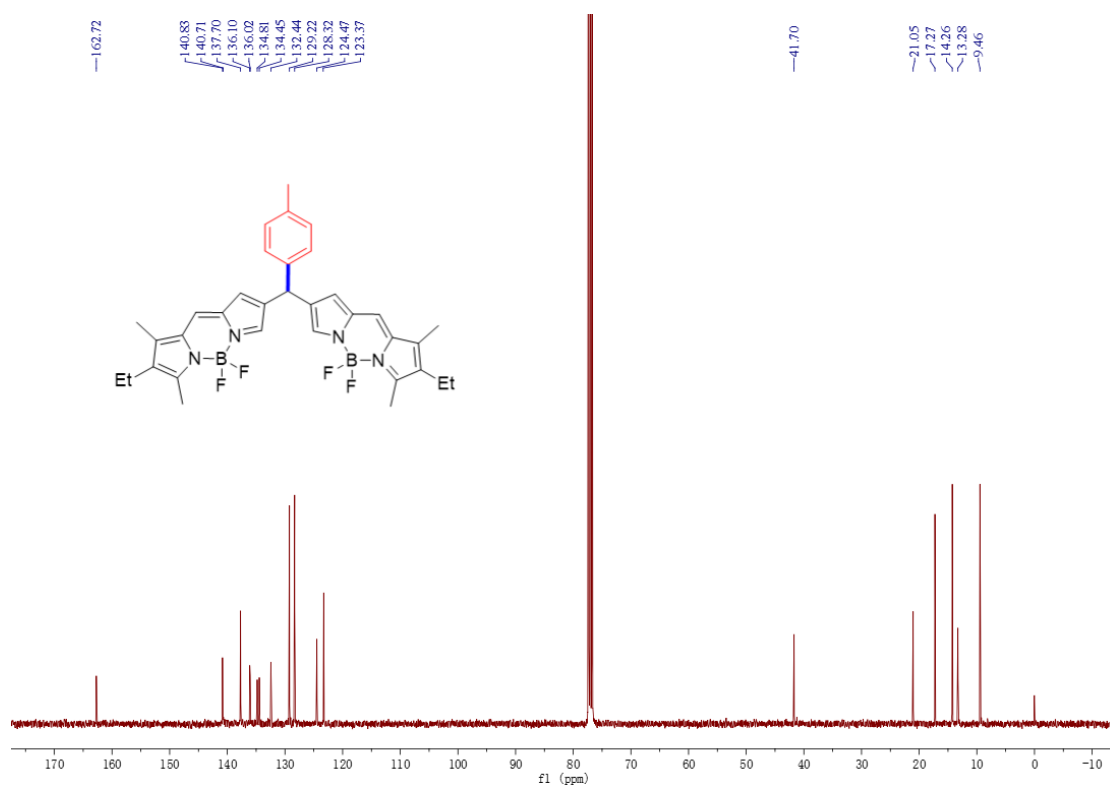

$^1\text{H}$  NMR spectrum of **1c** in  $\text{CDCl}_3$

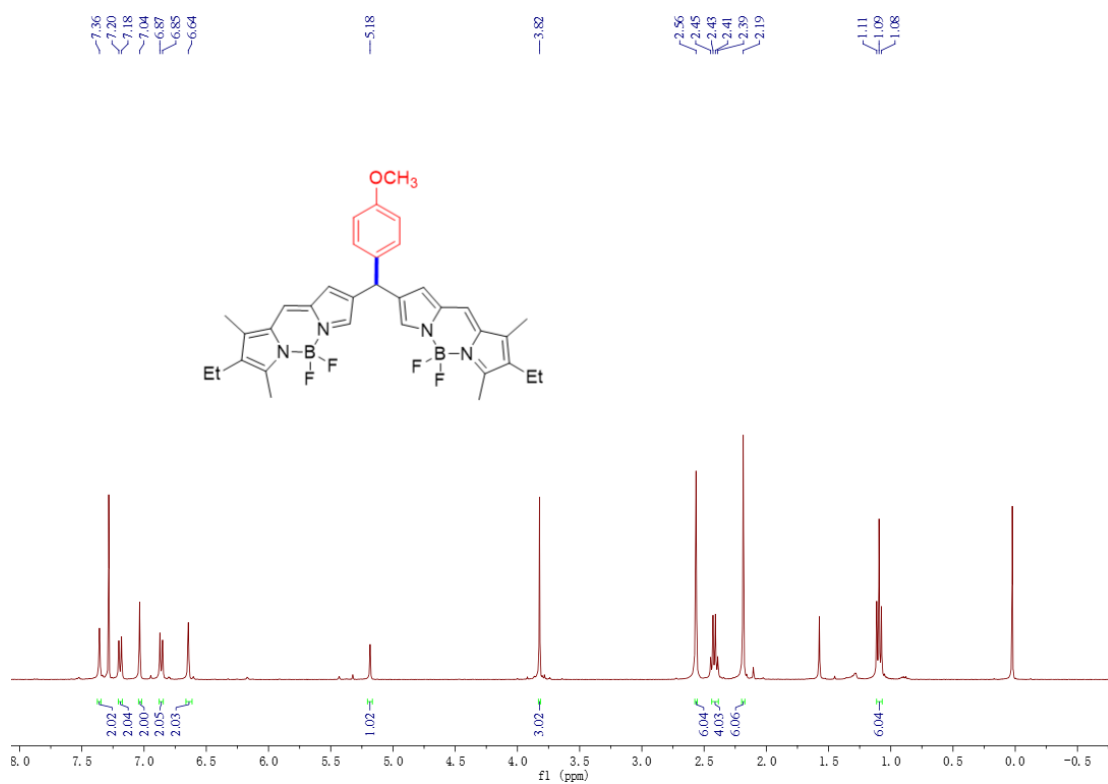

$^{13}\text{C}$  NMR spectrum of **1c** in  $\text{CDCl}_3$

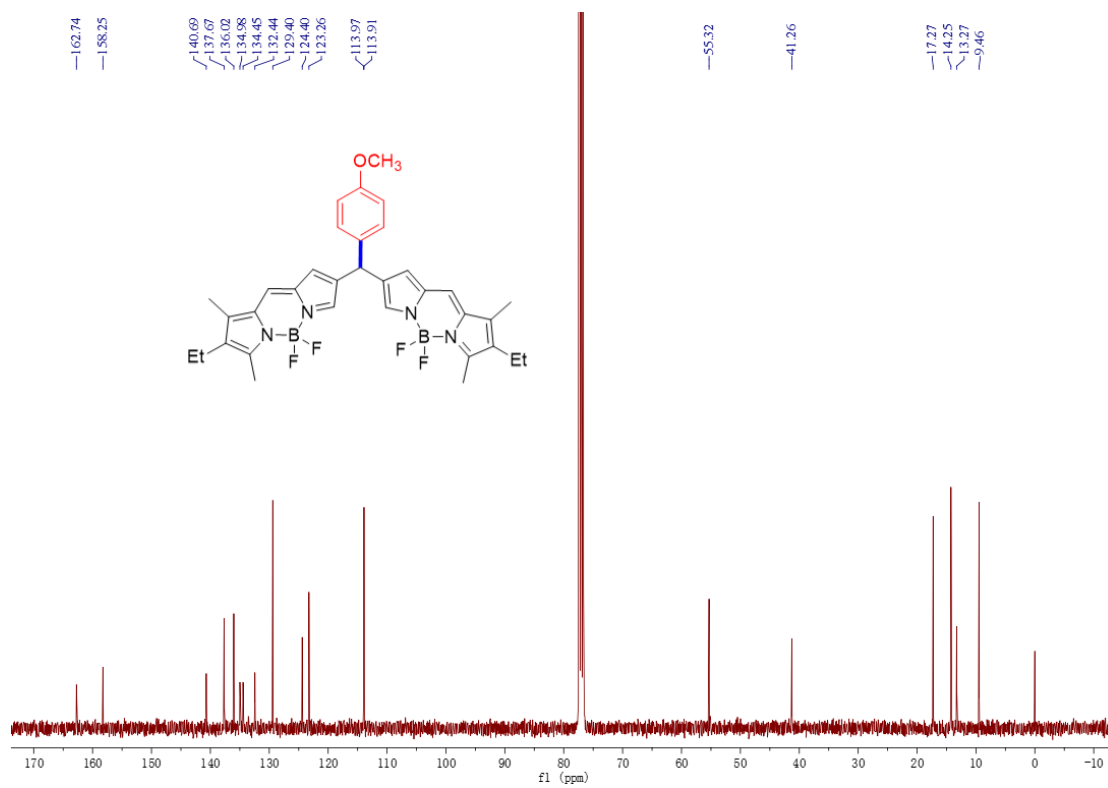

$^1\text{H}$  NMR spectrum of **1d** in  $\text{CDCl}_3$

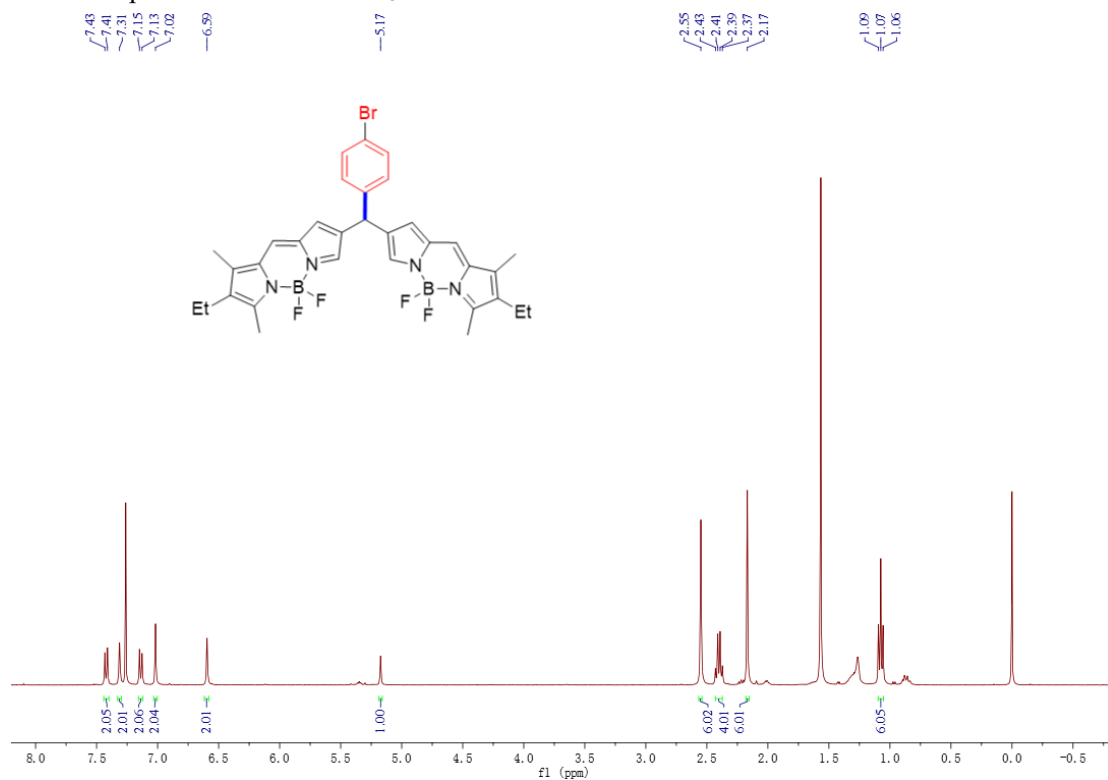

$^{13}\text{C}$  NMR spectrum of **1d** in  $\text{CDCl}_3$

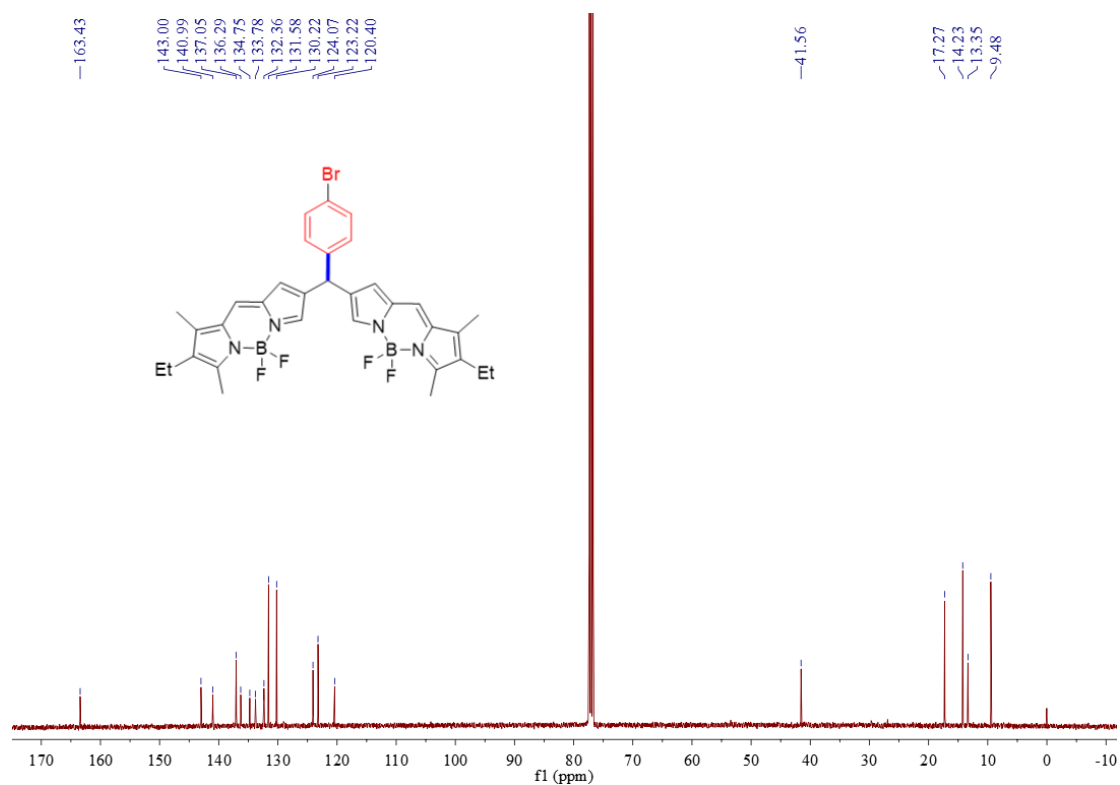

$^1\text{H}$  NMR spectrum of **1e** in  $\text{CDCl}_3$

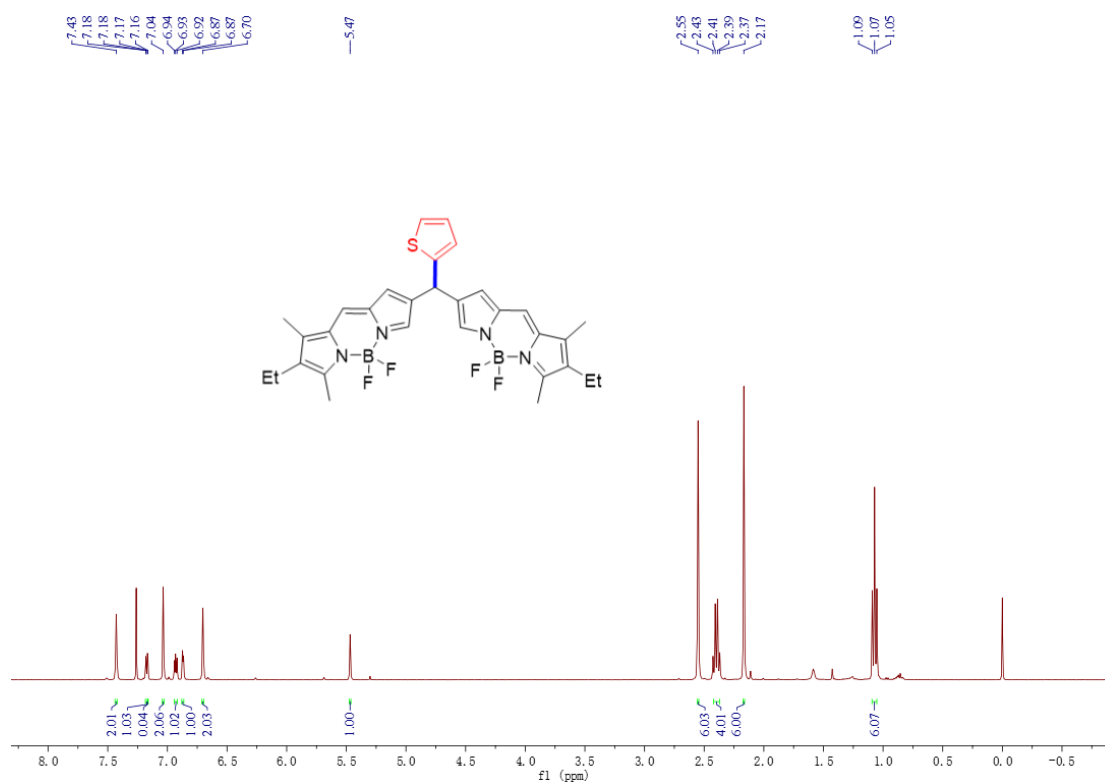

$^{13}\text{C}$  NMR spectrum of **1e** in  $\text{CDCl}_3$

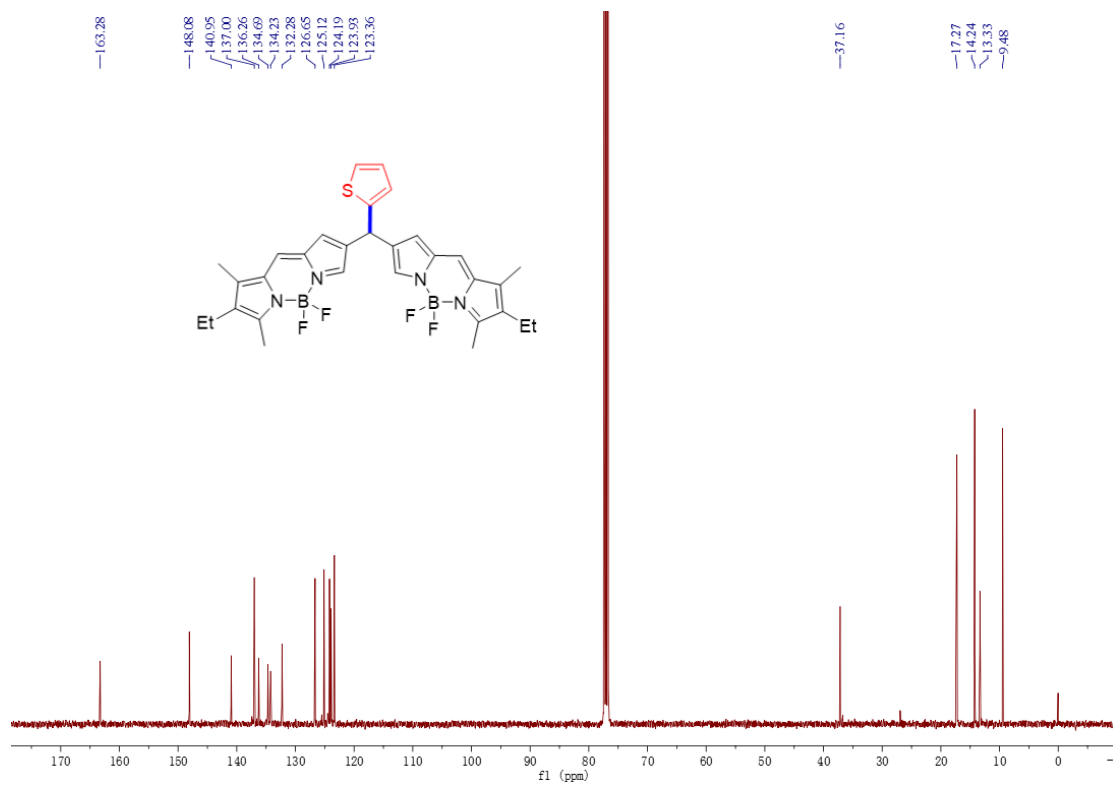

$^1\text{H}$  NMR spectrum of **1f** in  $\text{CDCl}_3$

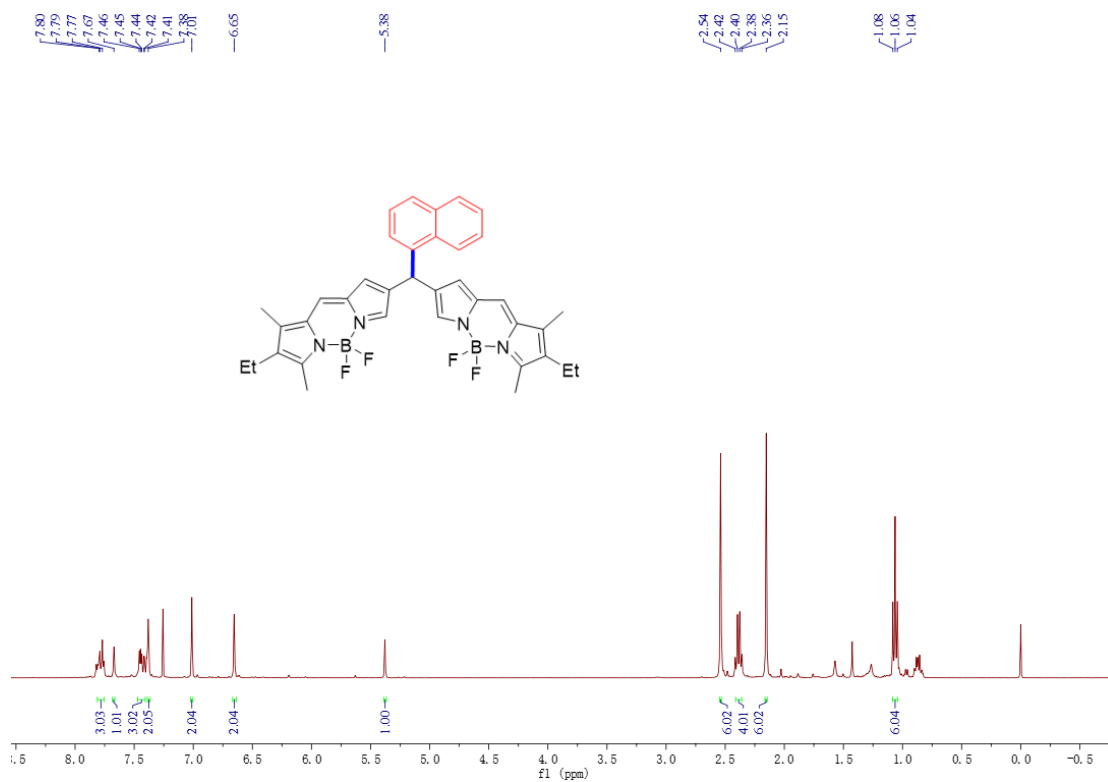

$^{13}\text{C}$  NMR spectrum of **1f** in  $\text{CDCl}_3$

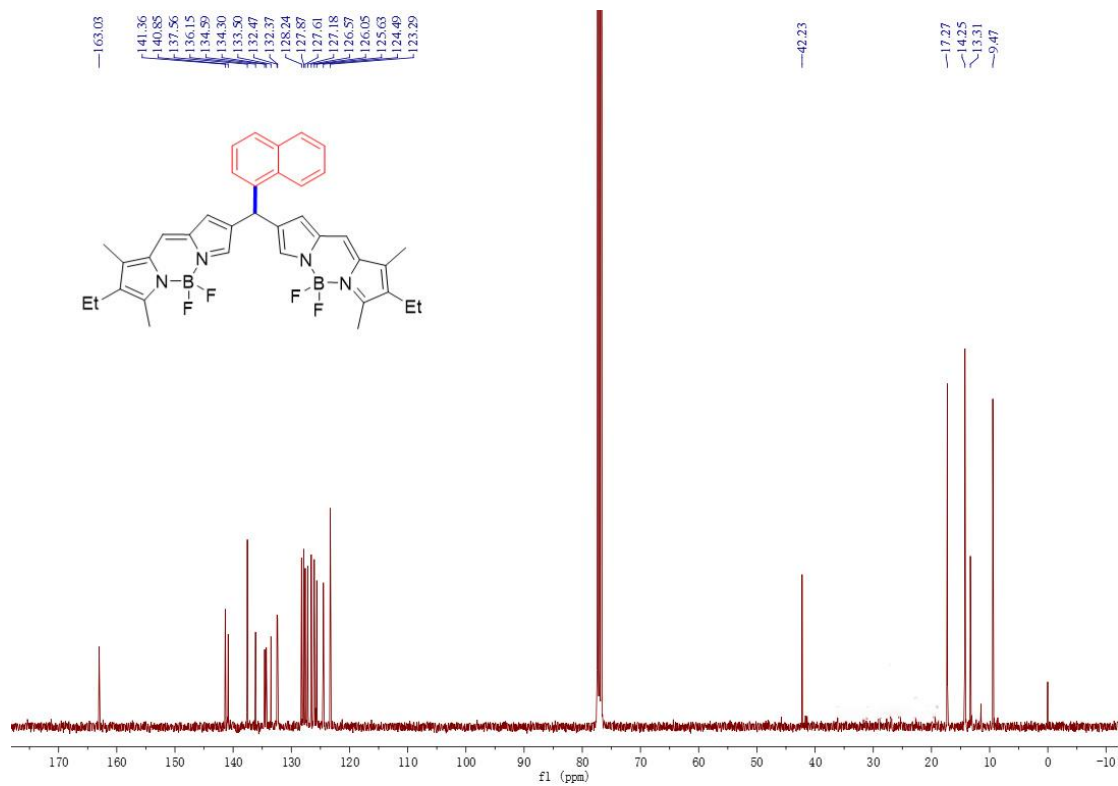

$^1\text{H}$  NMR spectrum of **1g** in  $\text{CDCl}_3$

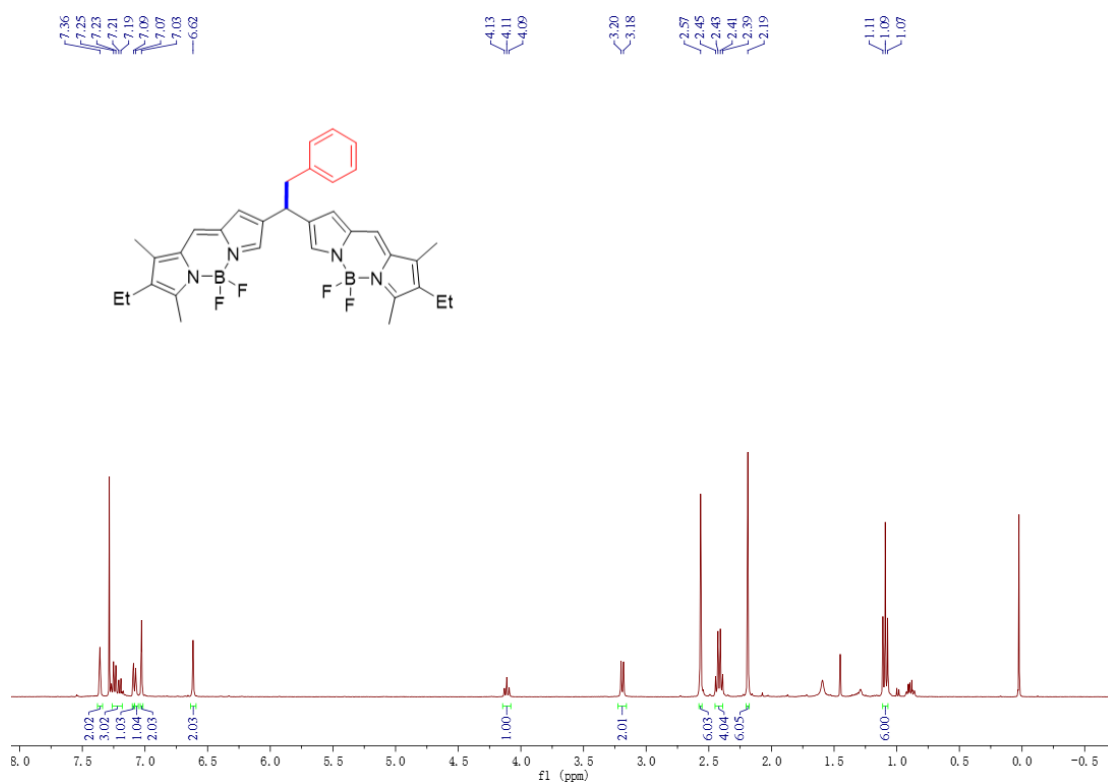

$^{13}\text{C}$  NMR spectrum of **1g** in  $\text{CDCl}_3$

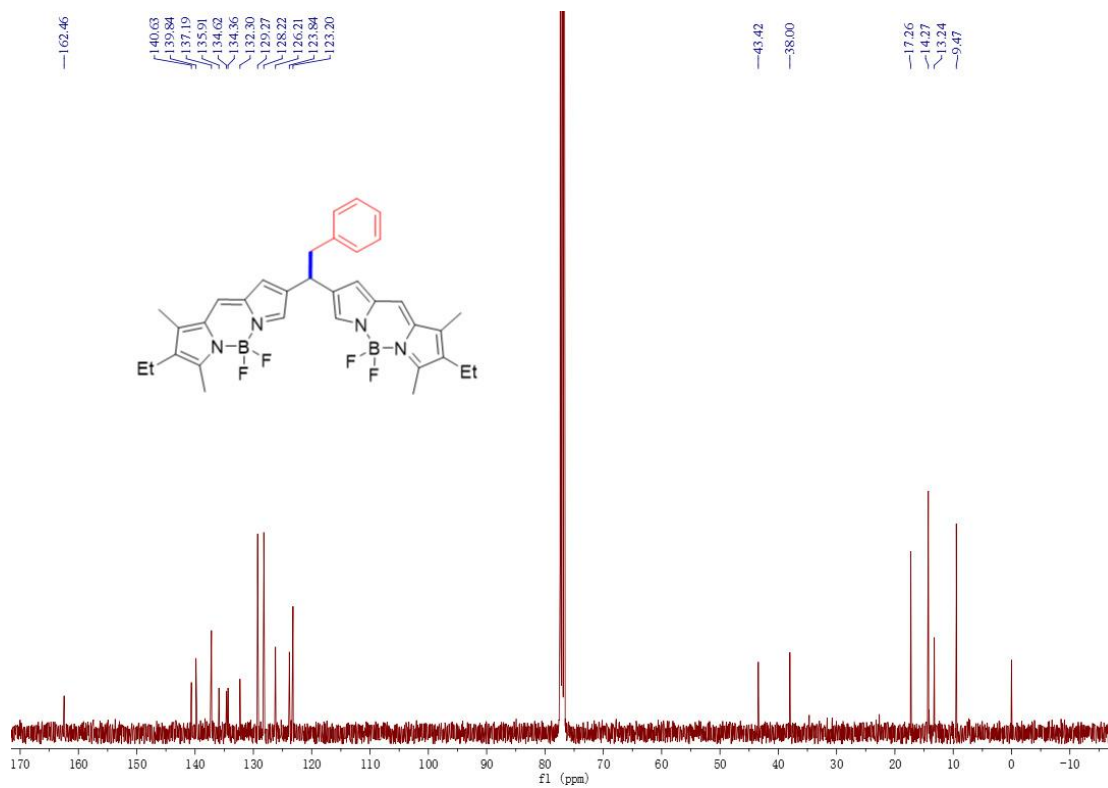

$^1\text{H}$  NMR spectrum of **1h** in  $\text{CDCl}_3$

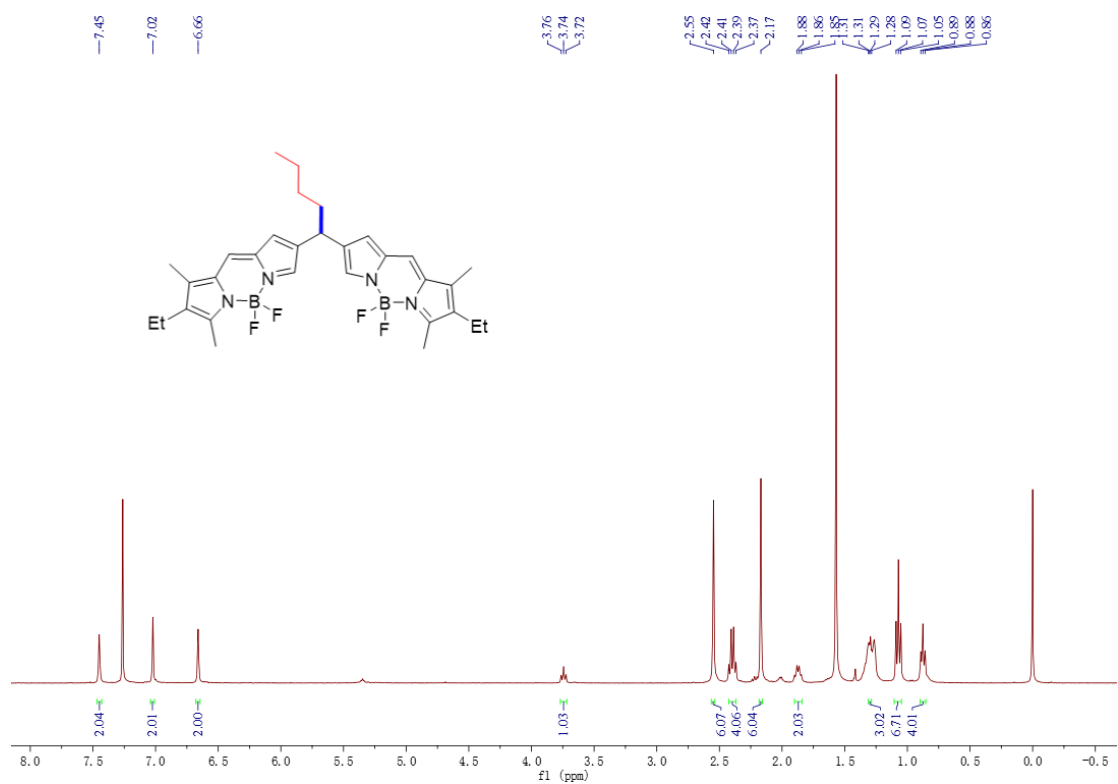

$^{13}\text{C}$  NMR spectrum of **1h** in  $\text{CDCl}_3$

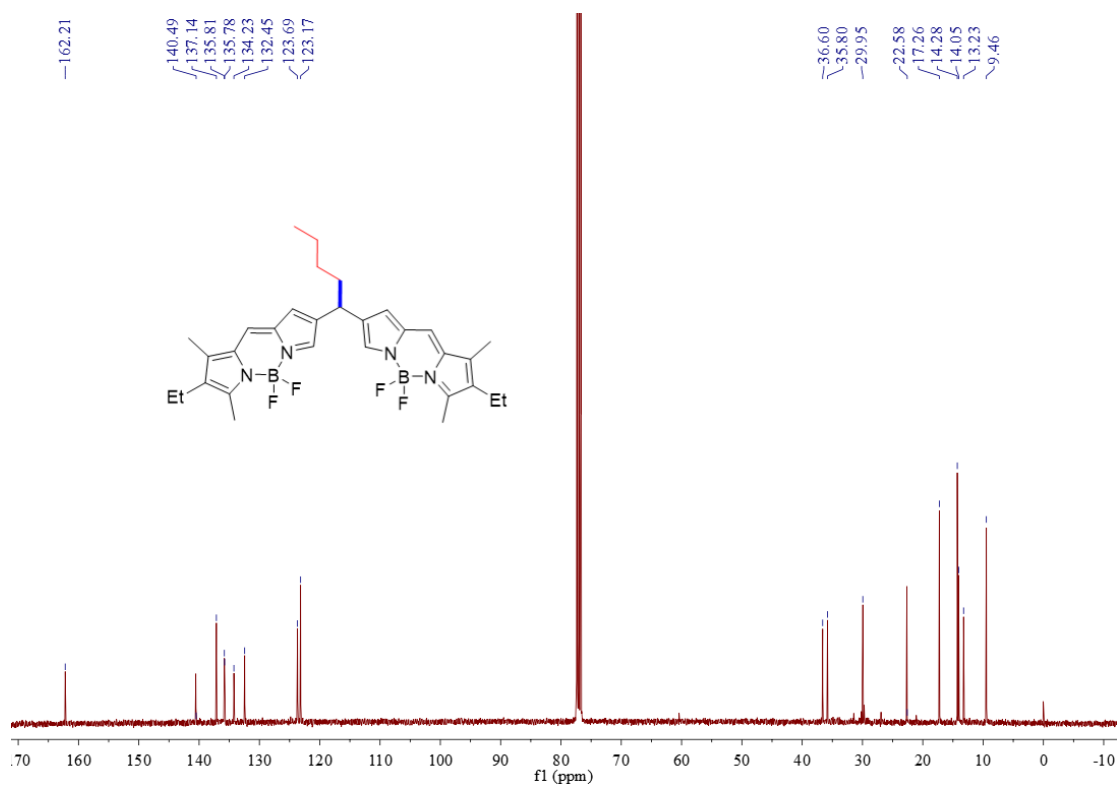

$^1\text{H}$  NMR spectrum of **1i** in  $\text{CDCl}_3$

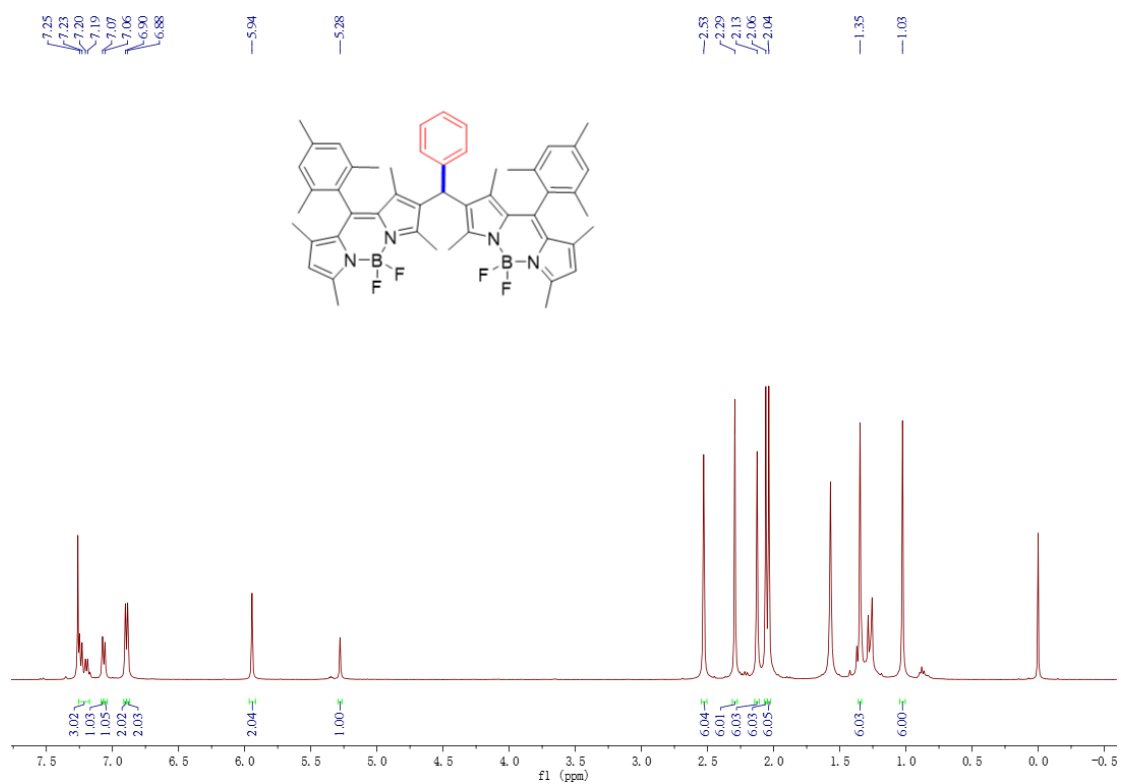

$^{13}\text{C}$  NMR spectrum of **1i** in  $\text{CDCl}_3$

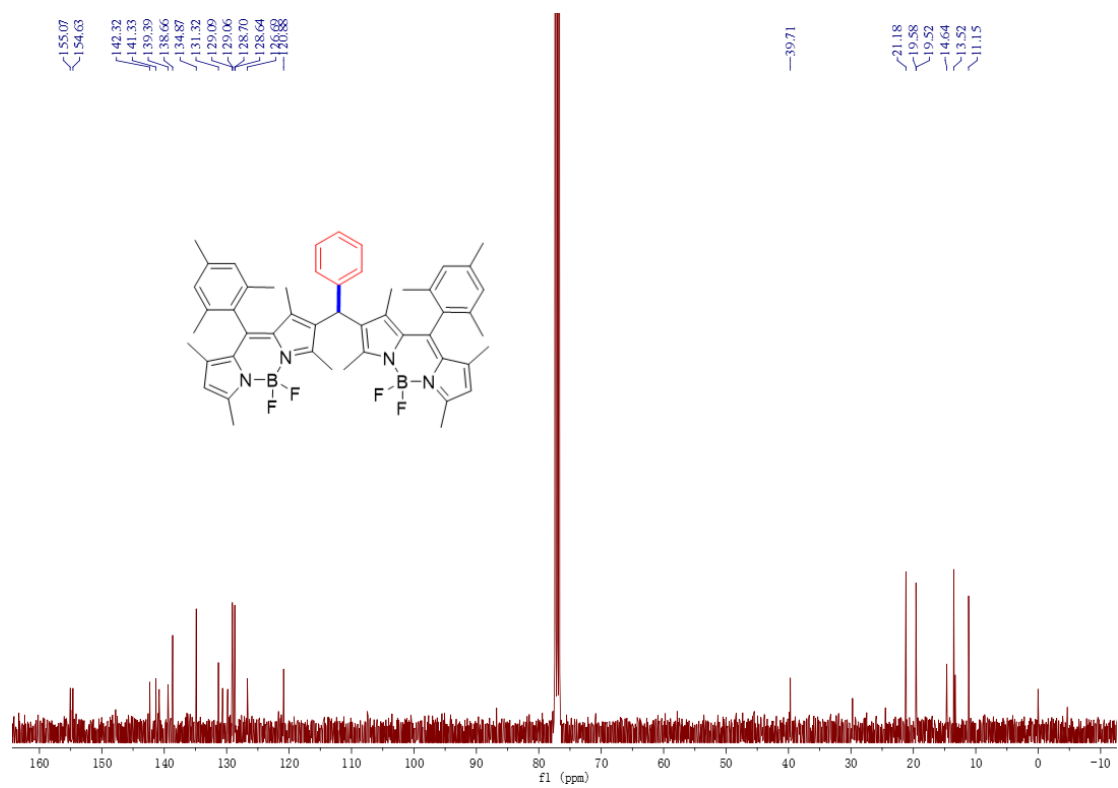

$^1\text{H}$  NMR spectrum of **1j** in  $\text{CDCl}_3$

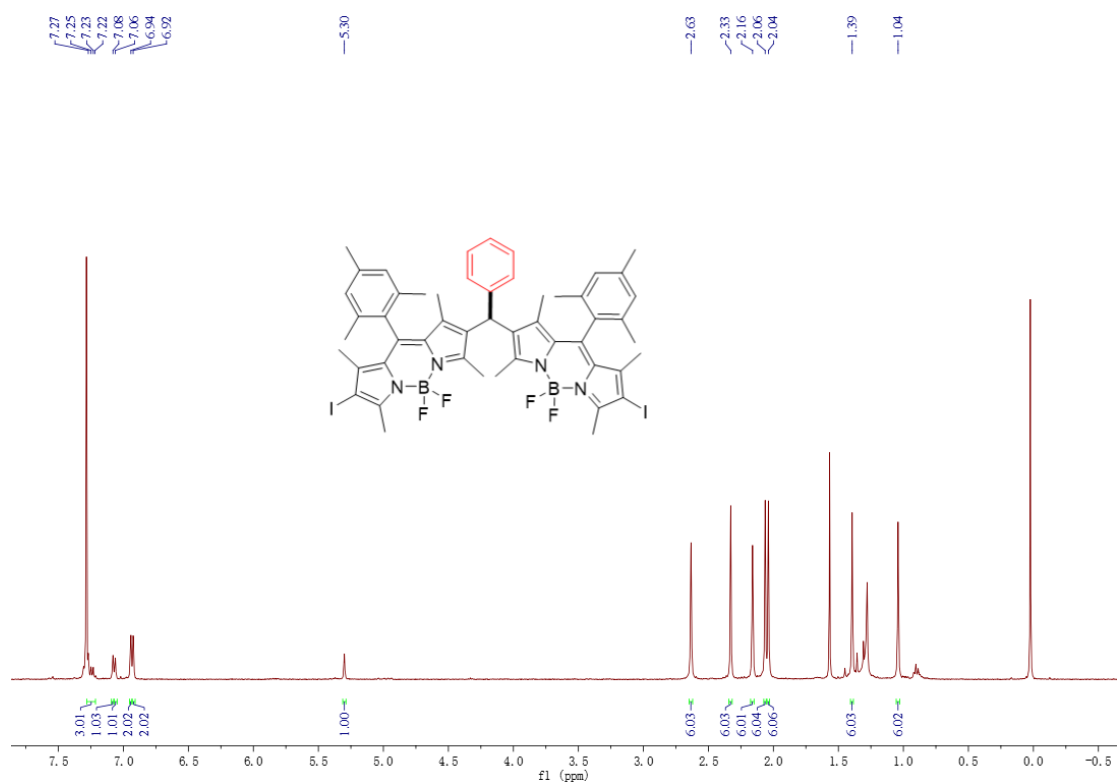

$^{13}\text{C}$  NMR spectrum of **1j** in  $\text{CDCl}_3$

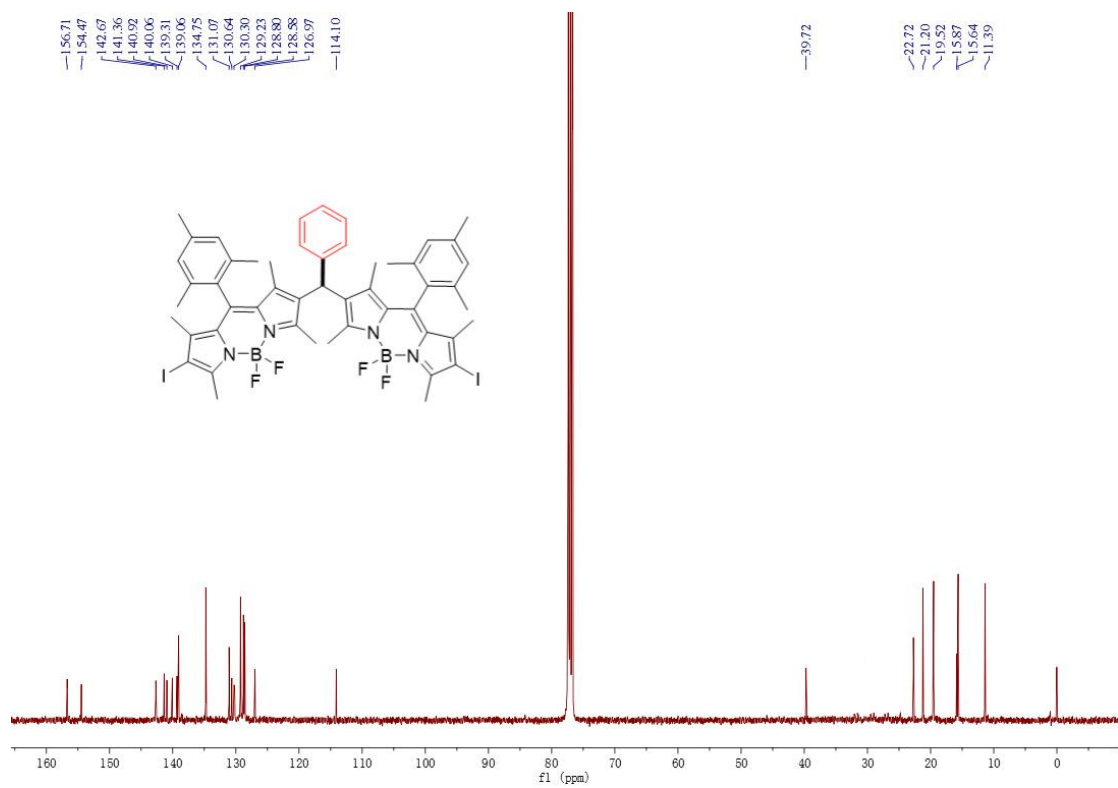

<sup>1</sup>H NMR spectrum of **4** in CDCl<sub>3</sub>

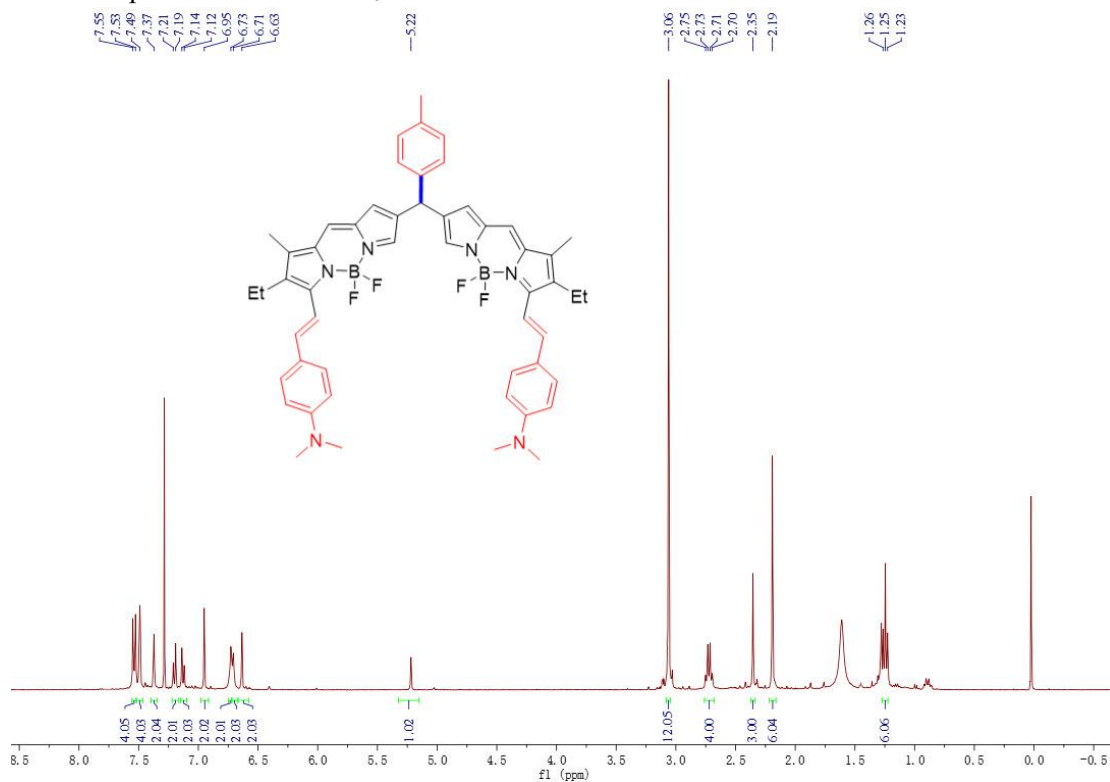

<sup>13</sup>C NMR spectrum of **4** in CDCl<sub>3</sub>

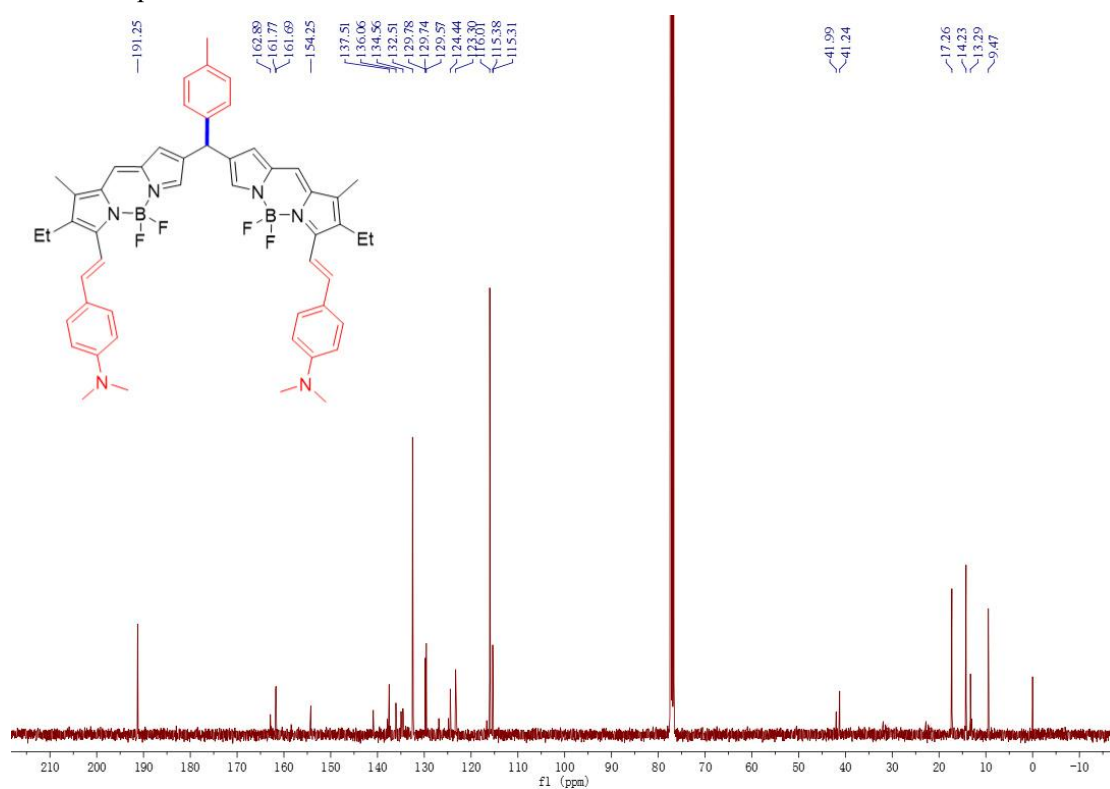

## HRMS spectra of 1a

253-1 #44 RT: 0.23 AV: 1 NL: 2.61E6  
T: FTMS + p ESI Full lock ms [80.0000-1200.0000]

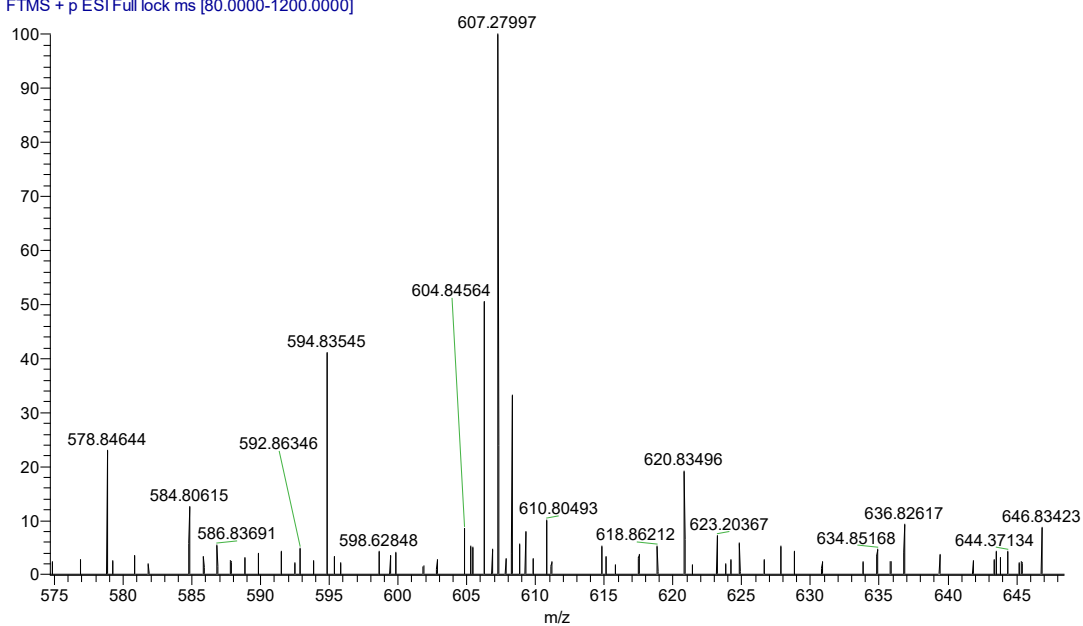

253-1 #18 RT: 0.10 AV: 1 NL: 1.33E8  
T: FTMS + p ESI Full lock ms [80.0000-1200.0000]

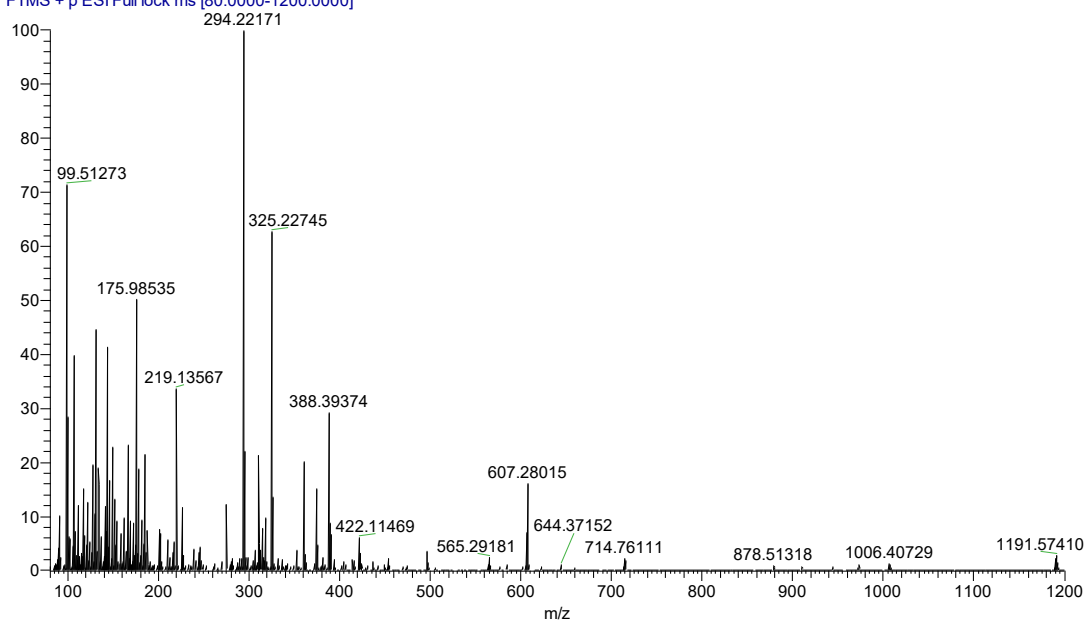

## HRMS spectra of **1b**

253-2 #17 RT: 0.09 AV: 1 NL: 1.39E7  
T: FTMS + p ESI Full lock ms [80.0000-1200.0000]

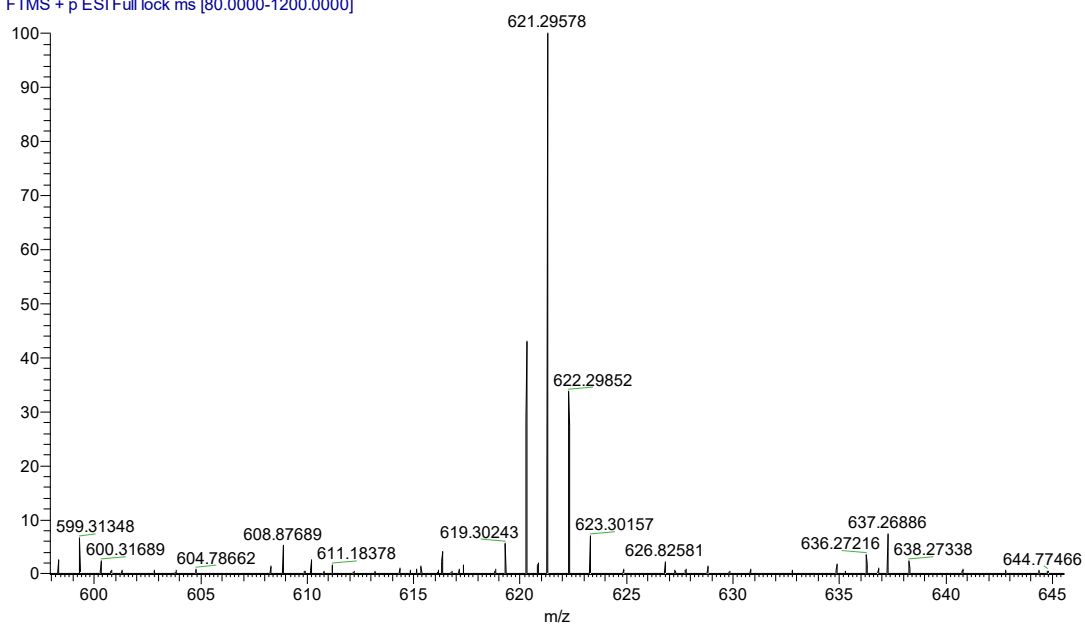

253-2 #20 RT: 0.11 AV: 1 NL: 9.81E7  
T: FTMS + p ESI Full lock ms [80.0000-1200.0000]

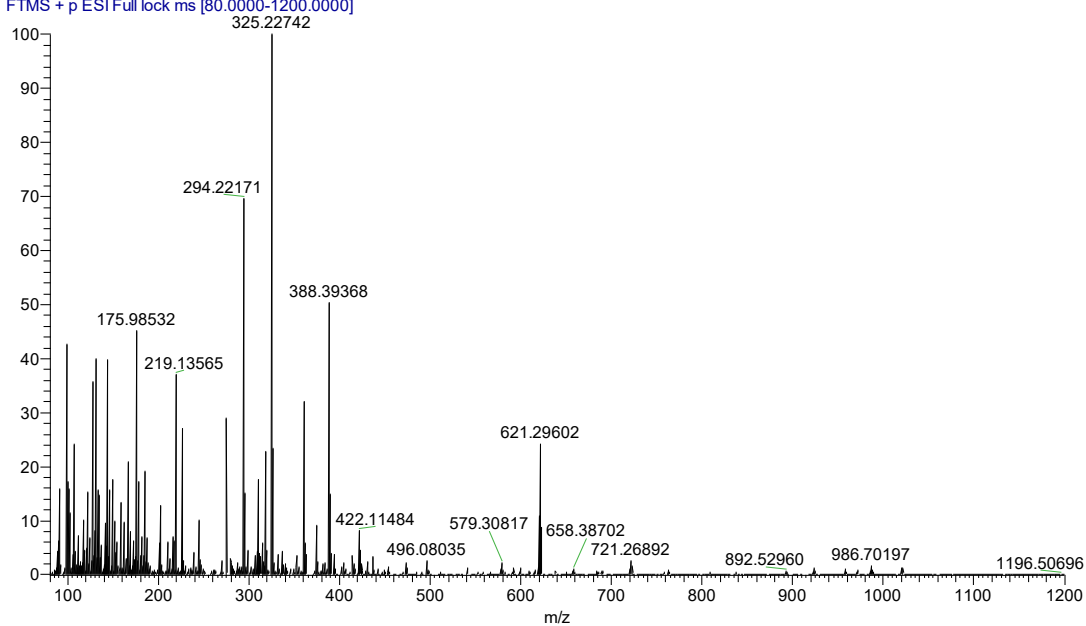

# HRMS spectra of 1c

253-3 #20 RT: 0.11 AV: 1 NL: 2.59E7  
T: FTMS + p ESI Full lock ms [80.0000-1200.0000]

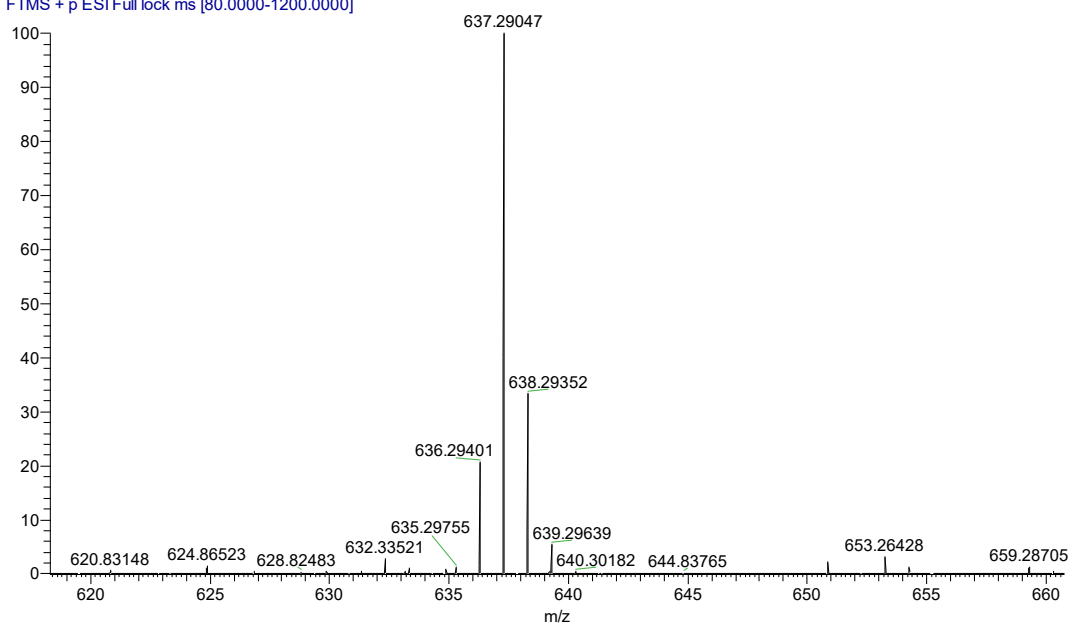

253-3 #20 RT: 0.11 AV: 1 NL: 1.15E8  
T: FTMS + p ESI Full lock ms [80.0000-1200.0000]

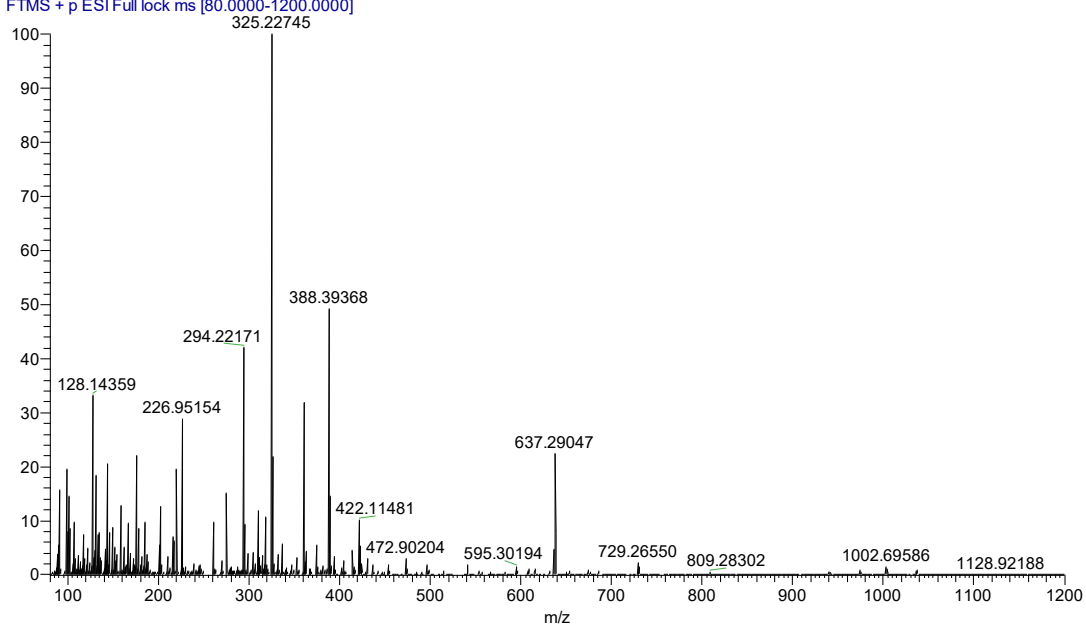

# HRMS spectra of 1d

253-4 #15 RT: 0.08 AV: 1 NL: 1.52E7  
T: FTMS + p ESI Full lock ms [80.0000-1200.0000]

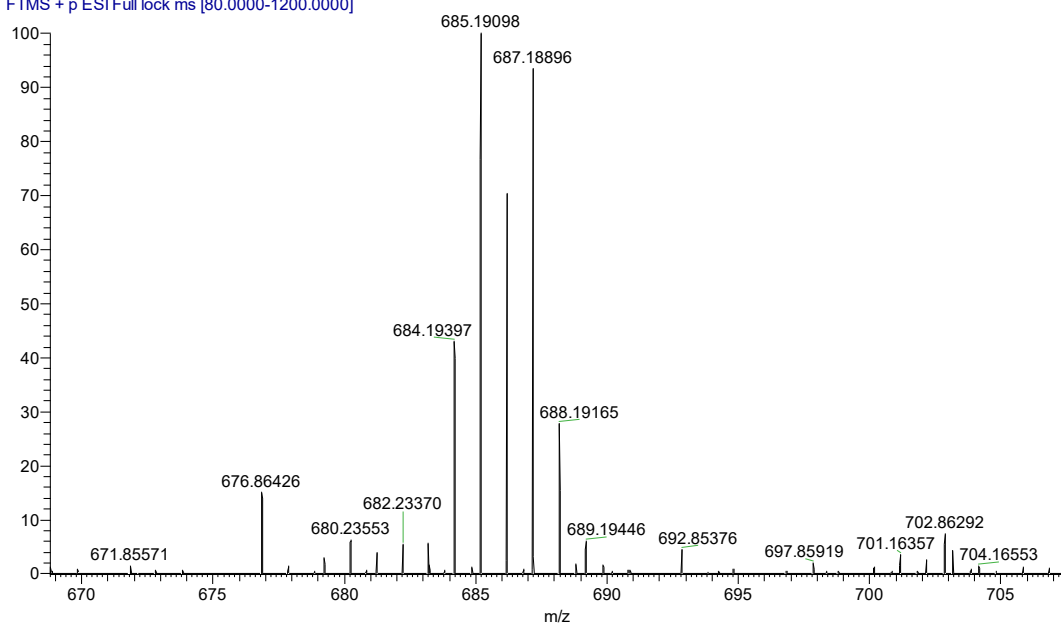

253-4 #15 RT: 0.08 AV: 1 NL: 1.07E8  
T: FTMS + p ESI Full lock ms [80.0000-1200.0000]

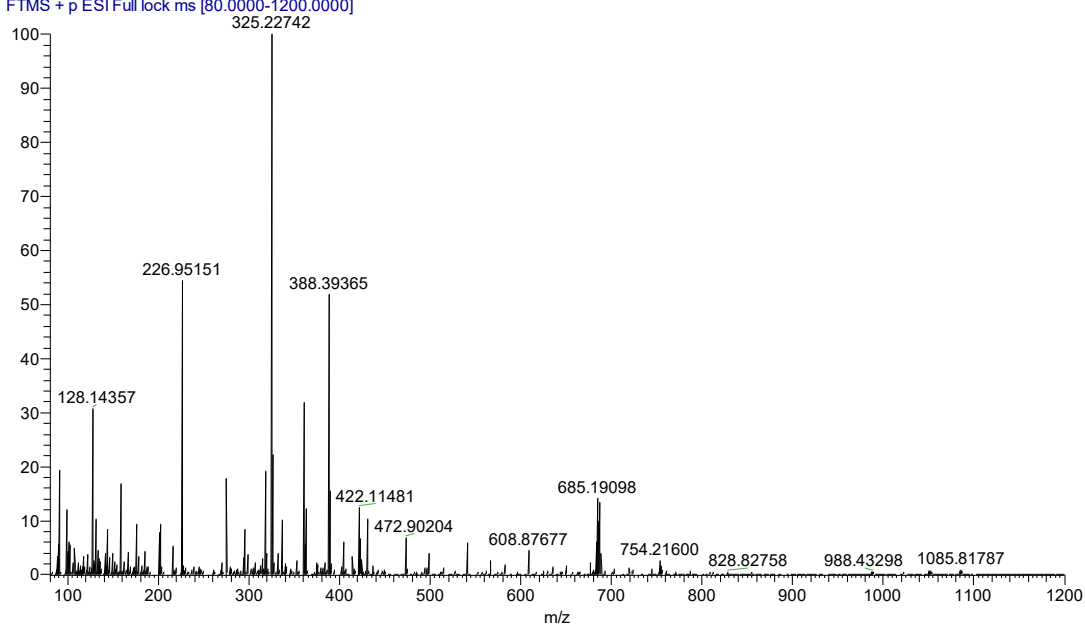

# HRMS spectra of 1e

253-5 #16 RT: 0.09 AV: 1 NL: 1.76E7  
T: FTMS + p ESI Full lock ms [80.0000-1200.0000]

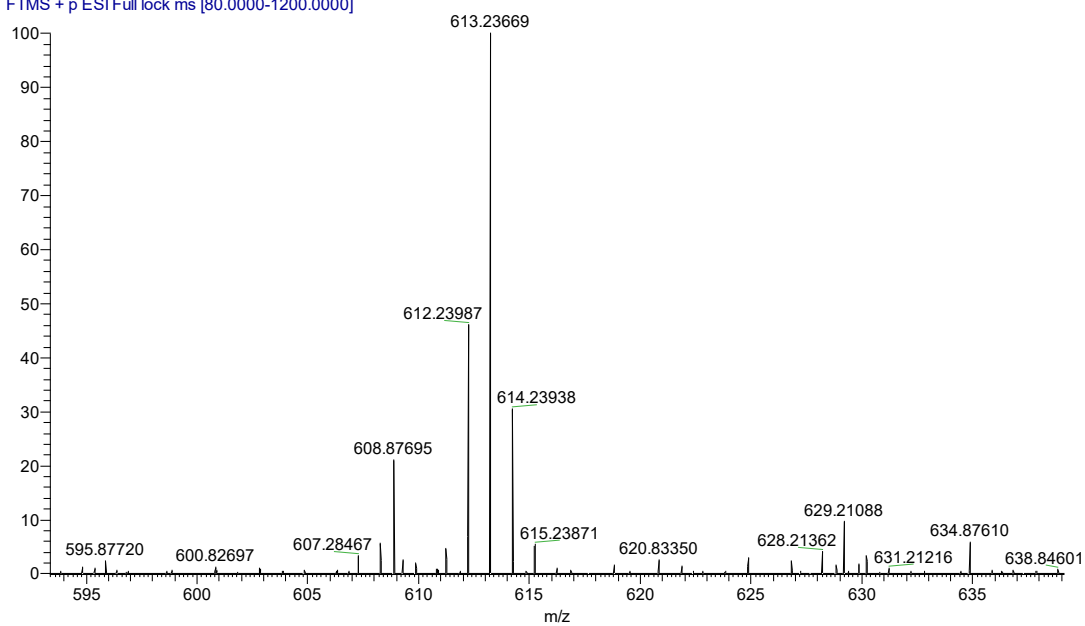

253-5 #16 RT: 0.09 AV: 1 NL: 1.17E8  
T: FTMS + p ESI Full lock ms [80.0000-1200.0000]

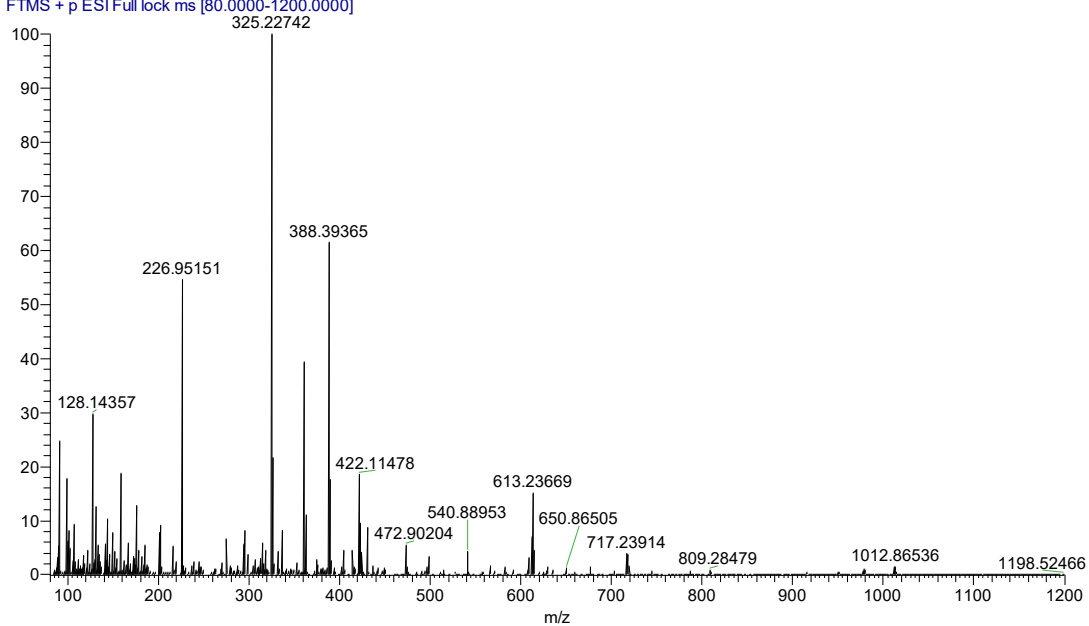

# HRMS spectra of 1f

253-6 #17 RT: 0.09 AV: 1 NL: 7.83E6  
T: FTMS + p ESI Full lock ms [80.0000-1200.0000]

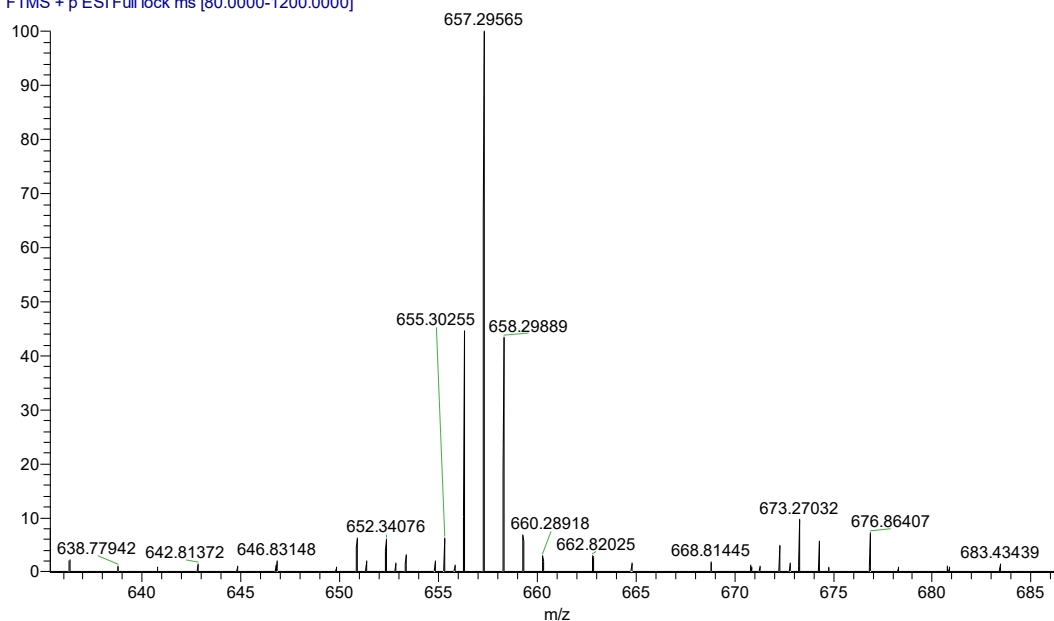

253-6 #17 RT: 0.09 AV: 1 NL: 1.13E8  
T: FTMS + p ESI Full lock ms [80.0000-1200.0000]

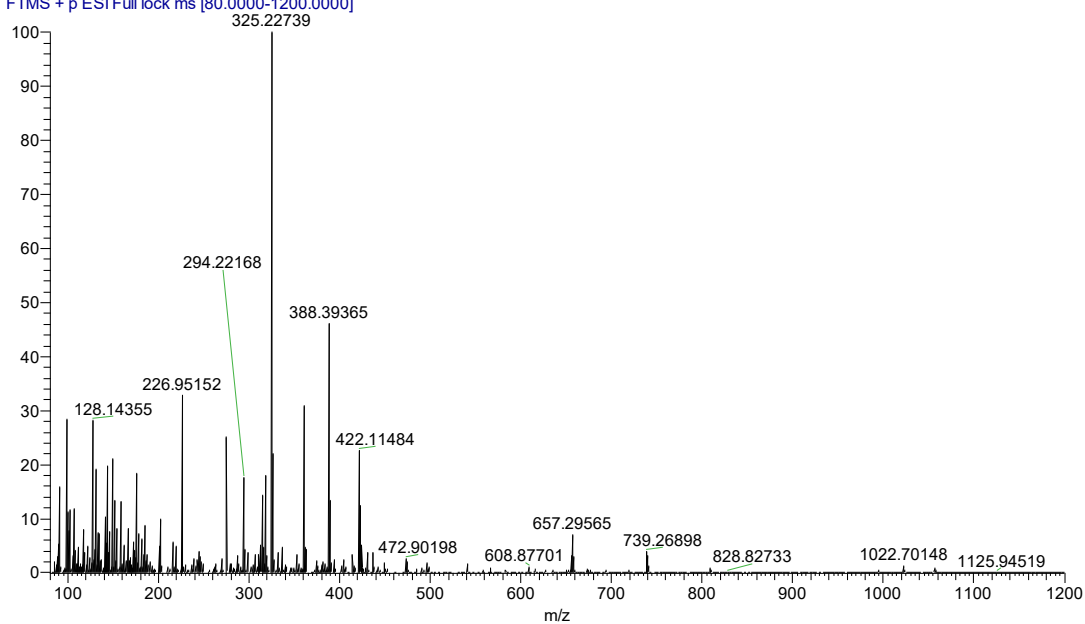

# HRMS spectra of 1g

253-7 #17 RT: 0.09 AV: 1 NL: 1.57E7  
T: FTMS + p ESI Full lock ms [80.0000-1200.0000]

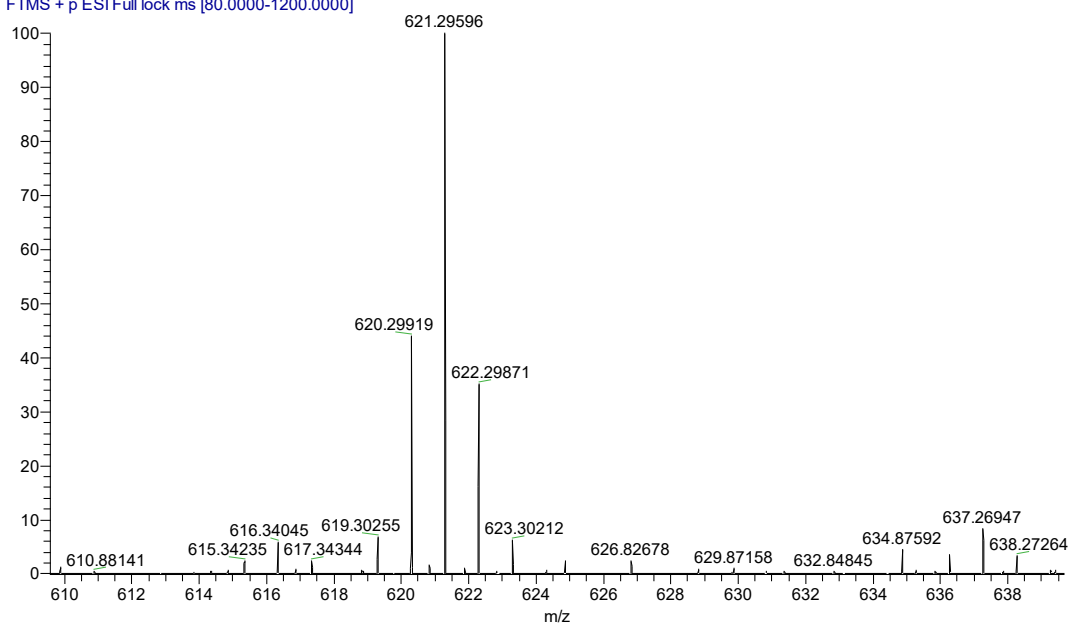

253-7 #17 RT: 0.09 AV: 1 NL: 9.26E7  
T: FTMS + p ESI Full lock ms [80.0000-1200.0000]

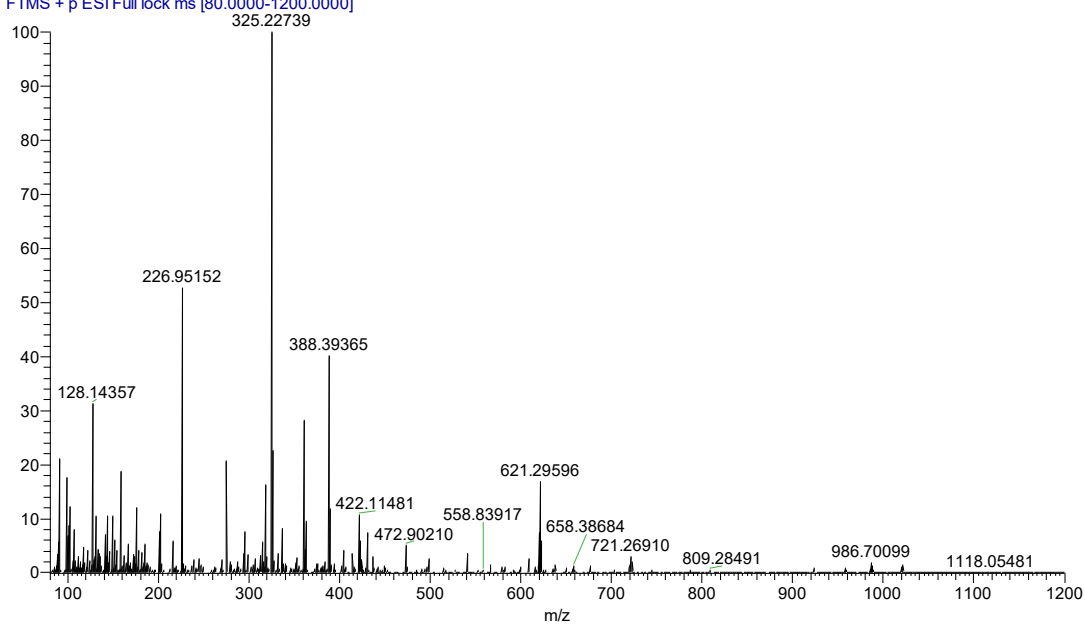

# HRMS spectra of 1h

253-8 #15 RT: 0.08 AV: 1 NL: 3.80E7  
T: FTMS + p ESI Full lock ms [80.0000-1200.0000]

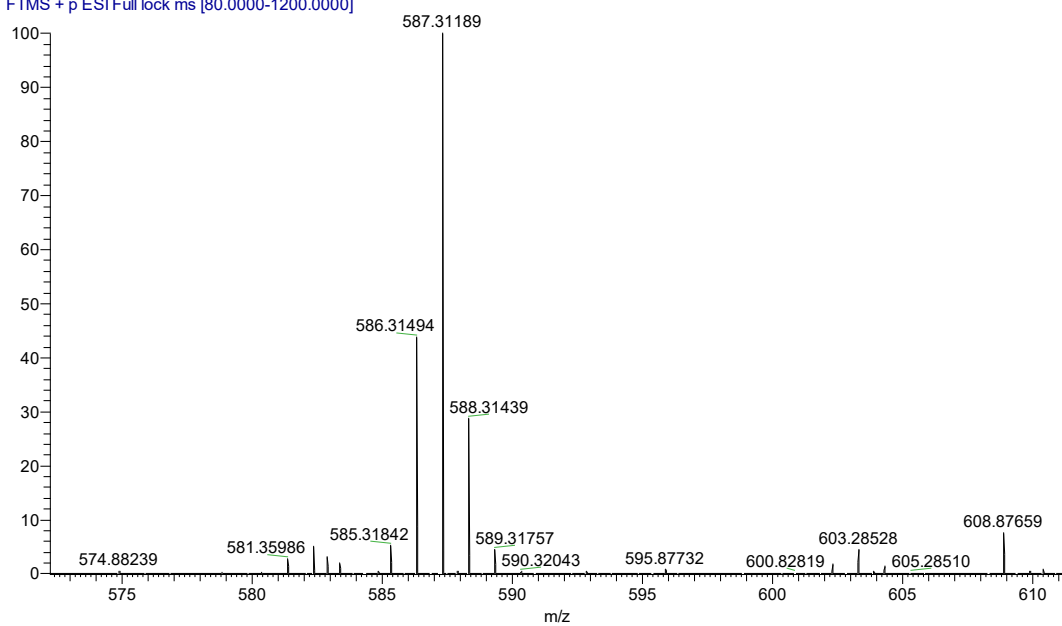

253-8 #18 RT: 0.10 AV: 1 NL: 6.27E7  
T: FTMS + p ESI Full lock ms [80.0000-1200.0000]

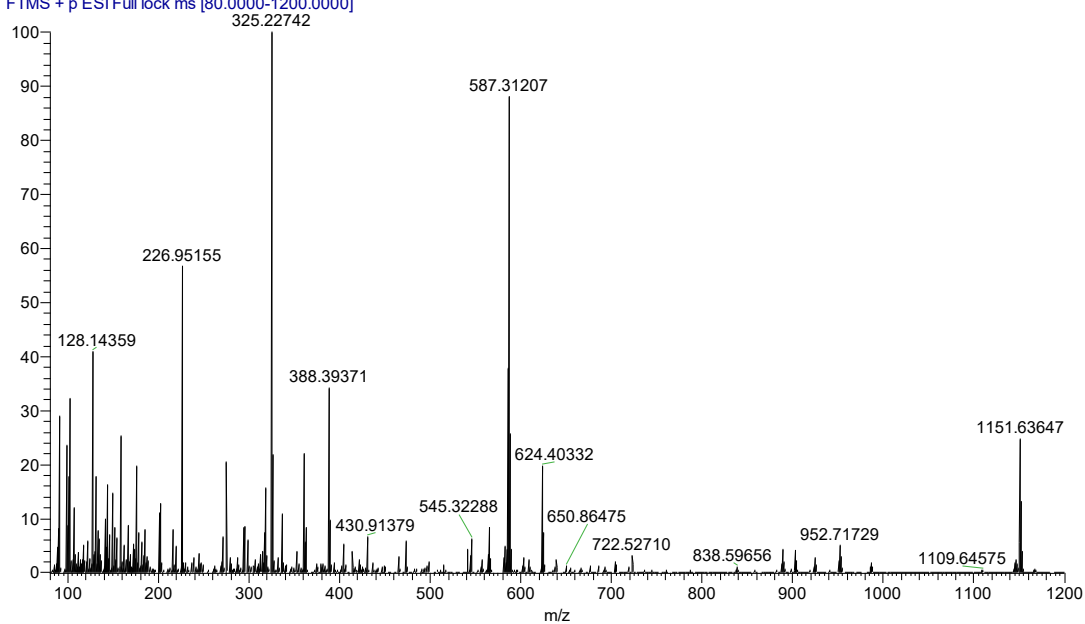

## HRMS spectra of **1i**

253-9 #12 RT: 0.06 AV: 1 NL: 2.26E6  
T: FTMS + p ESI Full lock ms [80.0000-1200.0000]

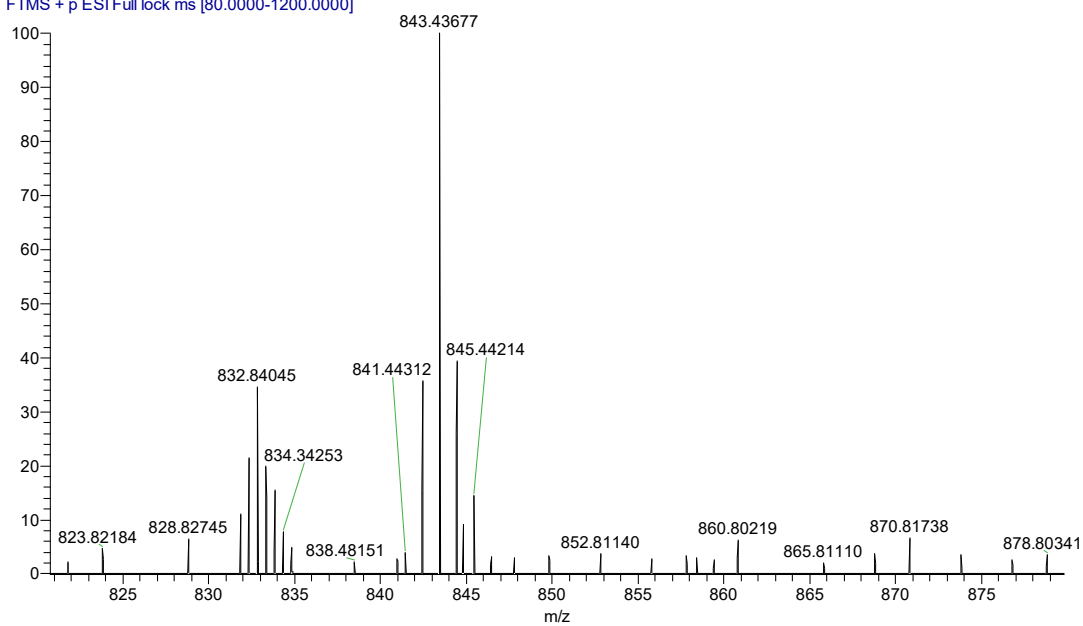

253-9 #19 RT: 0.10 AV: 1 NL: 1.03E8  
T: FTMS + p ESI Full lock ms [80.0000-1200.0000]

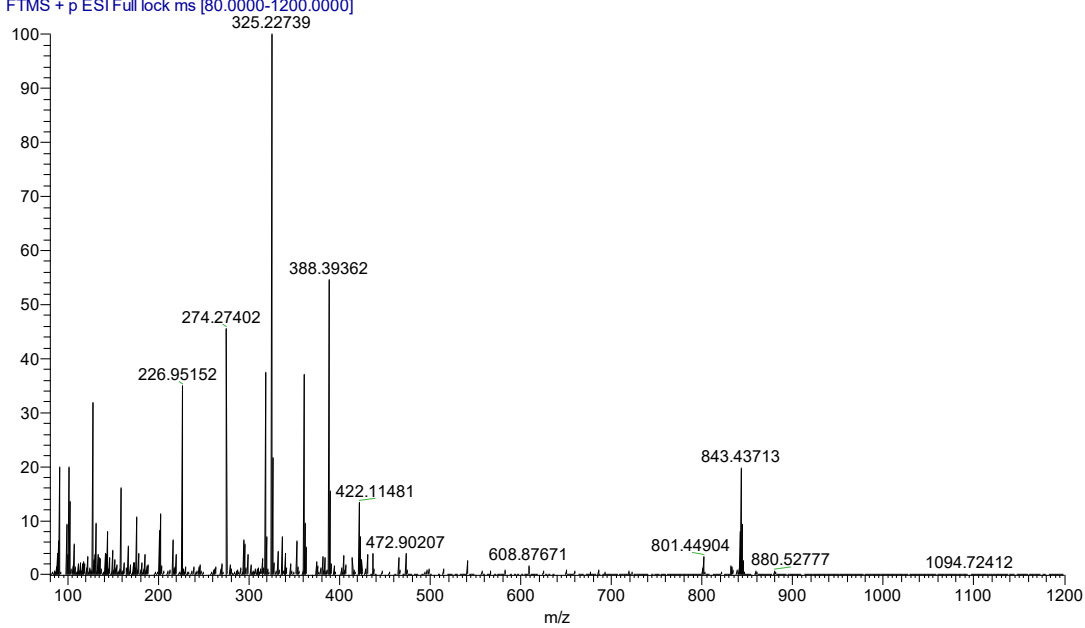

# HRMS spectra of 1j

SCIEX OS version: 3.0.0.3339  
Workstation ID: DESKTOP-UUEJFPD

Printed by: DESKTOP-UUEJFPD/luosp  
Printed on: 2026/1/19 0:16:03

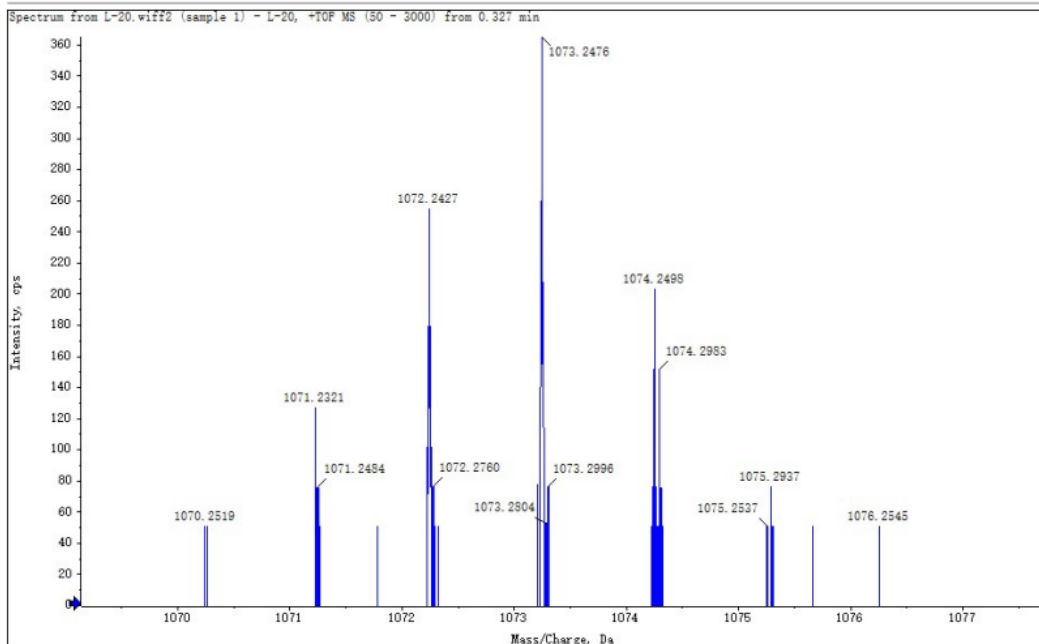

SCIEX OS version: 3.0.0.3339  
Workstation ID: DESKTOP-UUEJFPD

Printed by: DESKTOP-UUEJFPD/luosp  
Printed on: 2026/1/17 23:00:57

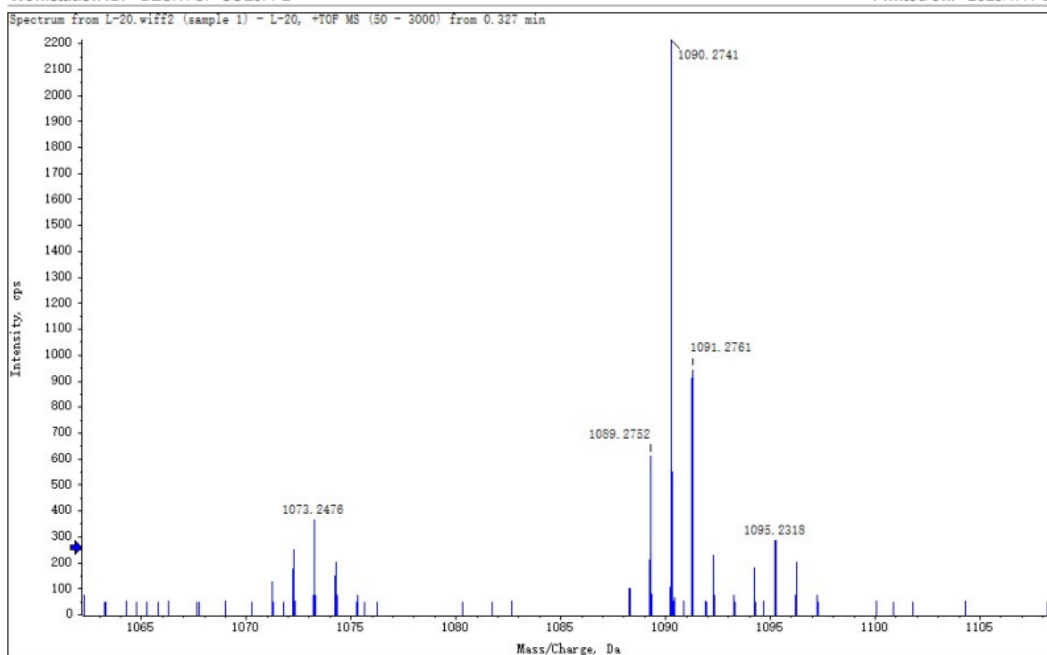

# HRMS spectra of 4

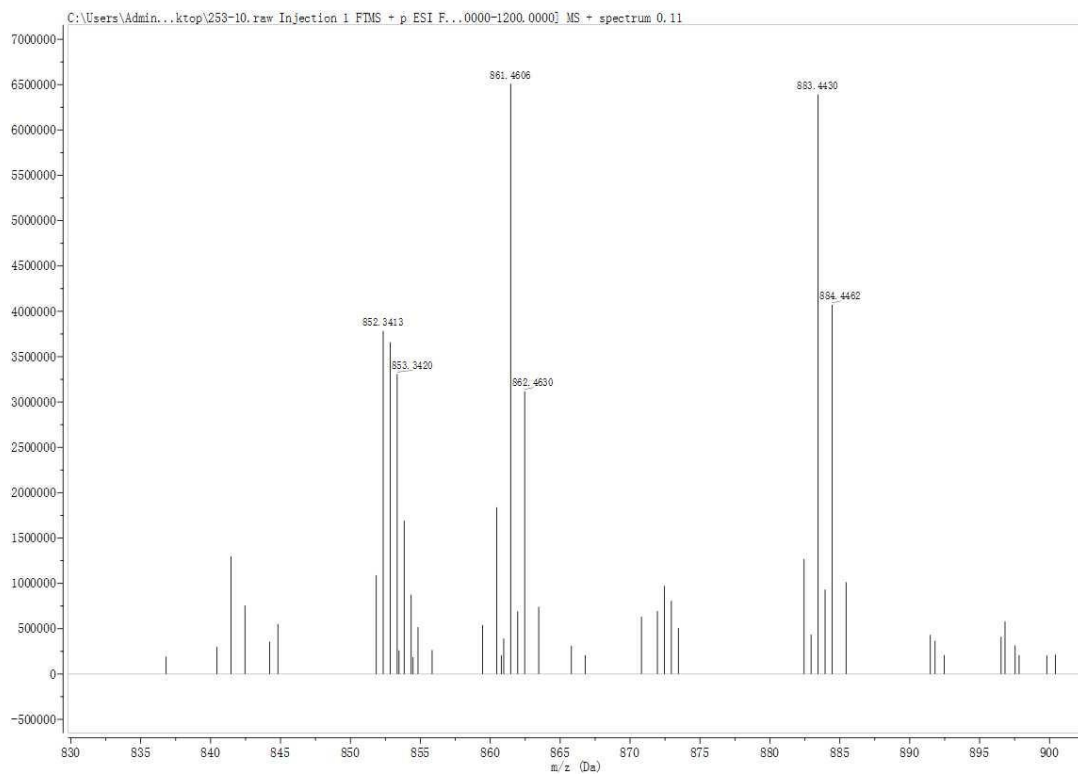

253-10 #15 RT: 0.08 AV: 1 NL: 1.22E8  
T: FTMS + p ESI Full lock ms [80.0000-1200.0000]

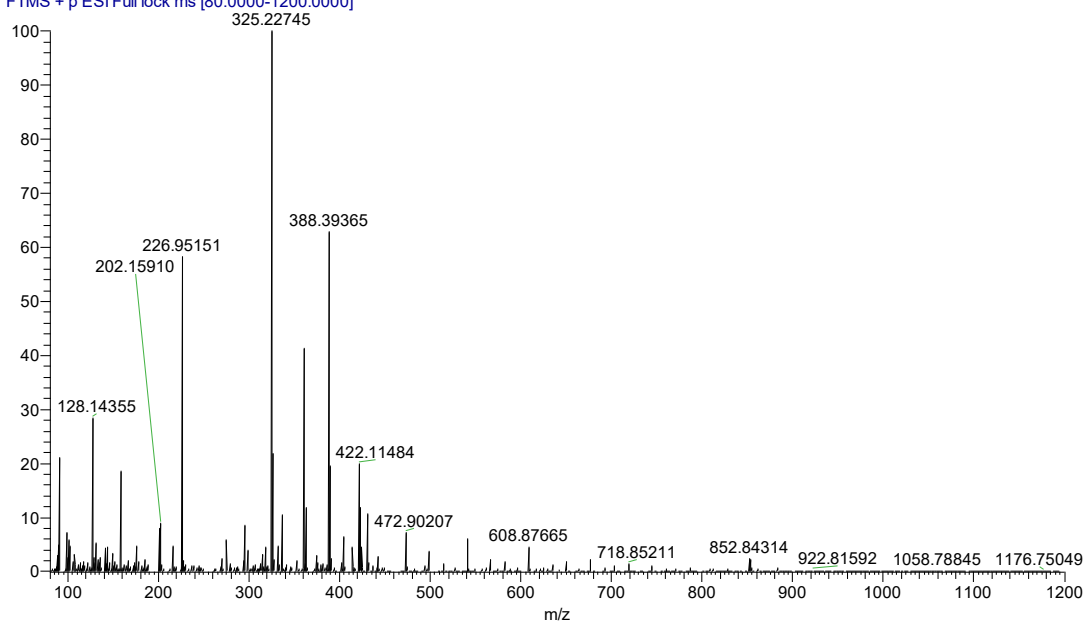

## 5. References

1. Vos de Wale, E.; Pardoën, J. A.; van Koeveeringe, J. A.; Lugtenburg, J. *Recl. Trav. Chim. Pays-Bas.*, 1977, **96**, 306.
2. T. Li, W. Gu, C. Yu, X. Lv, H. Wang, E. Hao and L. Jiao, *Chin. J. Chem.*, 2016, **34**, 989.
3. L. Gai, J. Mack, H. Lu, H. Yamada, D. Kuzuhara, G. Lai, Z. Li and Z. Shen, *Chem. Eur. J.*, 2014, **20**, 1091.
